# Supplementary material for: Aversive tension of adolescents with anorexia nervosa in daily course: a case-controlled and smartphone-based ambulatory monitoring trial
Source: PubMed Central journal article supplement — BMJ Open. 2014 Apr 23;4(4):e004703. doi: 10.1136/bmjopen-2013-004703 (PMC4010818; doi:10.1136/bmjopen-2013-004703), 2014-04-23
Supplement: bmjopen-2013-004703.draft_revisions.pdf [file bmjopen-2013-004703.draft_revisions.pdf]

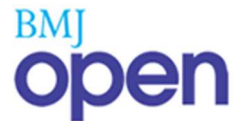

**Aversive tension of adolescents with anorexia nervosa in daily course: A case-controlled and smartphone-based ambulatory monitoring trial (SMART)**

|                                 |                                                                                                                                                                                                                                                                                                                                                                                                                                                                                                                                                                                                  |
|---------------------------------|--------------------------------------------------------------------------------------------------------------------------------------------------------------------------------------------------------------------------------------------------------------------------------------------------------------------------------------------------------------------------------------------------------------------------------------------------------------------------------------------------------------------------------------------------------------------------------------------------|
| Journal:                        | <i>BMJ Open</i>                                                                                                                                                                                                                                                                                                                                                                                                                                                                                                                                                                                  |
| Manuscript ID:                  | bmjopen-2013-004703                                                                                                                                                                                                                                                                                                                                                                                                                                                                                                                                                                              |
| Article Type:                   | Protocol                                                                                                                                                                                                                                                                                                                                                                                                                                                                                                                                                                                         |
| Date Submitted by the Author:   | 17-Dec-2013                                                                                                                                                                                                                                                                                                                                                                                                                                                                                                                                                                                      |
| Complete List of Authors:       | Kolar, David; Johannes-Gutenberg-Universitaet Mainz, Department for Child and Adolescent Psychiatry and Psychotherapy<br>Bürger, Arne; Johannes-Gutenberg-Universitaet Mainz, Department for Child and Adolescent Psychiatry and Psychotherapy<br>Hammerle, Florian; Johannes-Gutenberg-Universitaet Mainz, Department for Child and Adolescent Psychiatry and Psychotherapy<br>Jenetzky, Ekkehart; Johannes-Gutenberg-Universitaet Mainz, Department for Child and Adolescent Psychiatry and Psychotherapy; German Cancer Research Center, Division of Clinical Epidemiology and Aging Research |
| <b>Primary Subject Heading</b>: | Mental health                                                                                                                                                                                                                                                                                                                                                                                                                                                                                                                                                                                    |
| Secondary Subject Heading:      | Paediatrics                                                                                                                                                                                                                                                                                                                                                                                                                                                                                                                                                                                      |
| Keywords:                       | Child & adolescent psychiatry < PSYCHIATRY, Eating disorders < PSYCHIATRY, MENTAL HEALTH, Personality disorders < PSYCHIATRY                                                                                                                                                                                                                                                                                                                                                                                                                                                                     |
|                                 |                                                                                                                                                                                                                                                                                                                                                                                                                                                                                                                                                                                                  |

SCHOLARONE™  
Manuscripts

only

## Title page

Title: Aversive tension of adolescents with anorexia nervosa in daily course: A case-controlled and smartphone-based ambulatory monitoring trial (SMART)

David Raphael Kolar<sup>1</sup>, Arne Bürger<sup>1\*</sup>, Florian Hammerle<sup>1</sup>, Ekkehart Jenetzky<sup>1,2</sup>

1. Department for Child and Adolescent Psychiatry and Psychotherapy, Johannes-Gutenberg-University Mainz, Langenbeckstr. 1, D 55131 Mainz, Germany
2. Division of Clinical Epidemiology and Aging Research, German Cancer Research Center, Im Neuenheimer Feld 581, D 69120 Heidelberg, Germany

\*Corresponding author:

arne.buerger@unimedizin-mainz.de

Telephone: +49 6131 17-3282

Telefax: +49 6131 17-5580

## Word Count

3340

## Keywords

Aversive tension, anorexia nervosa, smartphone, ambulatory monitoring, dialectical behaviour therapy (DBT)

## Abstract

**Introduction:** Monitoring and reduction of aversive tension is a core issue in dialectical behaviour therapy of patients. It has been shown that aversive tension is increased in adult borderline personality disorder and is linked to low emotion labelling ability. However, until now there is no documented evidence that patients with anorexia nervosa suffer from aversive tension as well. Furthermore the usability of a smartphone application for ambulatory monitoring purposes has not been sufficiently explored.

**Methods and analysis:** We compare the mean and maximum self-reported aversive tension in 20 female adolescents (12-19 years) with anorexia nervosa in out-patient treatment with 20 healthy controls. They are required to answer hourly, over a two day period, i.e. about 30 times, four short questions on their smartphone, which ensures prompt documentation without any recall bias. At the close-out, the participants give a structured usability feedback on the application and the procedure.

**Ethics and dissemination:** The achieved result of this trial has direct relevance for efficient therapy strategies and is a prerequisite for trials regarding dialectical behaviour therapy in anorexia nervosa. The results will be disseminated through peer-review publications. The ethics committee of the regional medical association in Mainz, Germany approved the study protocol under the reference number 837.177.13.

**Registration details:** The trial is registered at the German clinical trials registration under the reference number DRKS00005228.

**STRENGTHS AND LIMITATIONS OF THIS STUDY**

- First controlled trial observing aversive tension in individuals with anorexia nervosa
- Momentary assessment for recognition bias reduction
- Using the personal smartphone devices of the participants for better compliance and fewer participation burden than in a trial using paper-based assessment methods
- Due to the ambulatory monitoring design, only out-patients can participate
- The monitoring software was not primarily developed for ambulatory monitoring trials and therefore the usability might be a little difficult

For peer review only

## INTRODUCTION

Anorexia nervosa (AN) is a very severe disorder with the highest lethality in mental disorders [1]. Due to the often less than promising therapy outcomes,[2] new ways to treat AN is still a developing research topic.[3, 4] Recently, an adaptation of the dialectical behaviour therapy (DBT) for the treatment of eating disorders has been made,[5] which was originally developed by Marsha Linehan [6, 7] for the treatment of chronically suicidal patients with borderline personality disorder (BPD). DBT focuses mainly on emotion regulation problems as the core reason for BPD. In line with this model, commitment to changing dysfunctional behaviour, direct contact to therapists in acute crisis, e.g. telephone coaching, and understanding of aversive tension as a consequence of missing emotion regulation strategies are therefore important parts of DBT. As DBT is currently discussed as a possible treatment solution for AN,[5] empirical research on the importance of its core assumptions (inter alia emotion dysregulation, aversive tension) in AN is clearly needed.

In regard to BPD, states of aversive tension have been reported previously.[8–11] Although in literature those states have been described using many different terms such as "psychological distress",[10] "heightened emotional arousal",[12] "tension",[13] or "aversive tension",[9, 14] we will use the term "aversive tension" for clarity reasons. Aversive tension refers to an emotional state that is perceived as negative and normally attended by high arousal,[15] but is not linked to a specific emotion. Hence the experience of aversive tension urges the subject to terminate this state immediately. Patients with BPD often use nonsuicidal self-injury (NSSI) as a maladaptive strategy to reduce aversive tension [16, 17] and to feel rapid relief from corresponding negative emotions.[18]

There are studies examining actual perceived aversive tension of patients with BPD.[8–10] Using ambulatory monitoring methods in two of their studies, both research groups could show that patients with BPD differ in the experience of aversive tension from healthy controls regarding mean levels and variation over time (higher levels, more frequent and rapid increases, longer persistence and slower refraction of aversive tension). Stiglmayr *et al.* [9] could also examine that applied DBT skills led to a reduction of aversive tension. Moreover, states of high aversive tension seem to be linked to an inability to label emotions at the same time, but only for patients with BPD.[10, 14] Even the previous value of aversive tension seems to be in some way related to emotion identification difficulties one hour later,[14] which suggests that aversive tension impairs the ability to name experienced emotions immediately and for a certain time span.

1  
2  
3 The previous mentioned findings are in line with the transactional model of BPD proposed by  
4 Fruzzetti *et al.*, [19] understanding BPD as an disorder of emotion regulation. Clear and brief,  
5 biological vulnerability together with invalidating responses from others regarding the  
6 emotional state of the subject will lead to aversive tension. To reduce these states of aversive  
7 tension, patients with BPD will then most likely use dysfunctional emotion regulation  
8 strategies like NSSI. Recently Haynos *et al.* [12] adapted this model for AN, emphasising the  
9 idea that AN is also a disorder of emotion regulation. They suggest that a person with AN will  
10 experience aversive tension especially after events related to food intake or body exposure.  
11 Instead of using NSSI as an emotion regulation strategy like patients with BPD, persons  
12 suffering from AN will tend to excessive exercising (after food intake) or starvation behaviour  
13 (after e.g. body exposure, criticism by intimates) for a brief reduction in arousal. This will  
14 thereby lead, via negative reinforcement, to a circulus vitiosus with more frequent starvation  
15 behaviour and body weight reduction. This is supported by a recent study relating lower body  
16 mass indices in women with acute AN to fewer emotion regulation problems, although this  
17 association was not observed in other sub-samples.[20]

18 Although clinical practice indicates that patients with AN benefit from DBT skills training,  
19 empirical research is still scarce. So far, there has been only one controlled trial conducted  
20 comparing DBT with treatment as usual (TAU) in adolescent patients with AN.[21] Few pilot  
21 studies on adapted DBT programmes for patients with AN and a co-morbid BPD exist,[22,  
22 23] but all of these findings are promising regarding the effectiveness of DBT in the therapy  
23 of AN. As previously mentioned, DBT focuses on emotion regulation. The previous studies  
24 regarding DBT treatment of AN suppose by adopting DBT for AN that emotion regulation  
25 problems and aversive tension are the main factors for starvation behaviour, but surprisingly  
26 the occurrence of aversive tension in AN was never questioned in an empirical study before.  
27 Neither is there any literature on the experience of aversive tension of adolescents, although  
28 DBT manuals for the treatment of adolescents with high risk for NSSI have been published  
29 recently.[24, 25] Regarding the inability to label emotions, it is also unclear if this is a specific  
30 BPD problem, a general psychopathology phenomenon or a consequence of aversive tension.  
31 Therefore, the main aim of this study is to show if adolescent patients with AN differ from  
32 control subjects in their report of experienced aversive tension. Additionally, we will  
33 investigate a possible relation to the ability to label emotions on an exploratory level.

34 In the past the observance of mood or behaviour in everyday life was mostly conducted by  
35 filling in paper-based diaries or more recently by using hand-held computers distributed by  
36 the research group.[26] Due to the lack of high quality and reasonably priced software,  
37  
38  
39  
40  
41  
42  
43  
44  
45  
46  
47  
48  
49  
50  
51  
52  
53  
54  
55  
56  
57  
58  
59  
60

usually the programming for the hand-held computer devices was done by the researcher himself. Currently, the wide distribution of smartphone devices especially in the population of adolescents offers a new way for an ambulatory monitoring of mood changes in daily course. For the most common smartphone software, Android® and iOS®, there are low priced and user-friendly monitoring software solutions available.[27] The benefit of using the subjects' own devices may not only be the lower research costs. Especially in the research with adolescent subjects, a software application run on their smartphone instead of a less accessible and old fashioned research device could be preferred and lead to less missing data.

### **Aims**

The aim of this study is to investigate for the first time the experience of aversive tension of patients with an AN diagnosis. We hypothesize that in a period of two days the patient subsample will report (1) higher average values and (2) higher maximum values of aversive tension.

## **METHODS AND ANALYSIS**

The current study will be an observational case-control study with a sample size of at least 40 participants. Figure 1 provides a brief overview of the assessment schedule.

### **Participants and recruitment**

The study is taking place at the medical centres Rheinhessen-Fachklinik Mainz in cooperation with the Department of Child and Adolescent Psychiatry and Psychotherapy of the Universitaetsmedizin at the Johannes-Gutenberg Universitaet Mainz and DRK-Fachklinik Bad Neuenahr, Germany. Both entities will invite outpatients with AN to participate in the study. Control subjects are recruited in the local region by word-of-mouth invitation of the study coordinator.

### **Inclusion and exclusion criteria**

Due to the low prevalence of AN in the male population [28] and to avoid confounding variables by gender, only female outpatients between 12 and 19 years with a current diagnosis of AN (according to the International Classification of Diseases, version 10; ICD-10) will be included. The diagnosis must be confirmed by the outpatient clinics of the medical centres Rheinhessen-Fachklinik Mainz or DRK-Fachklinik Bad Neuenahr based on the German version of the Eating Disorder Examination adapted for children (chEDE) [29]. Participants of the patient group will be excluded in case of or presumed diagnosis of an impulsive

personality disorder (F60.30) or emotionally unstable personality disorder also called BPD (F60.31). Previous studies have already shown the existence of states of high aversive tension in patients with this type of personality disorders.[9] Other co-morbid disorders will be allowed if AN is the primary diagnosis. Control participants with any diagnosis of a mental disorder in the last five years will be excluded, as well as control participants with a high symptom burden based on the global severity index. For a summary of inclusion and exclusion criteria, see Table 1.

**Table 1. Summary of inclusion and exclusion criteria**

| Inclusion criteria          | Patient group                                                                                                                      | Control group                                                                                                                                                |
|-----------------------------|------------------------------------------------------------------------------------------------------------------------------------|--------------------------------------------------------------------------------------------------------------------------------------------------------------|
| Gender                      | Female                                                                                                                             | female                                                                                                                                                       |
| Age                         | 12 to 19 years                                                                                                                     | 12 to 19 years                                                                                                                                               |
| Disorder                    | Anorexia nervosa (F50.0)                                                                                                           | Healthy controls                                                                                                                                             |
| Experience with smartphones | Existent                                                                                                                           | existent                                                                                                                                                     |
| Exclusion criteria          |                                                                                                                                    |                                                                                                                                                              |
| Disorder                    | (presumed) diagnosis of<br>- impulsive personality<br>disorder (F60.30)<br>- emotionally unstable<br>personality disorder (F60.31) | any diagnosis of a mental<br>disorder in the past five years<br><br>high symptom burden<br>( $T \geq 63$ on the global<br>severity index of the SCL90-<br>R) |

### Primary and secondary outcomes

The primary outcome of the study is the mean value of aversive tension; co-primary is the maximum value of aversive tension.

Main secondary outcome is the daily course of aversive tension (e.g. increases, decreases), the ability to label emotions, and reported emotions and occupations. To assess the acceptance of the method, we will report differences in the compliance of both groups.

In addition we will explore the usability of the smartphone application and the acceptance of using a personal smartphone. Influencing factors are socio-demographic data, mental symptom burden, emotion regulation strategies (FEEL-KJ) and the actual experienced emotion as well as the actual occupation at each assessment moment.

### Assessments



1  
2  
3 Both control subjects and patients will participate in a pre-questionnaire (socio-demographics,  
4 SCL90-R, FEEL-KJ) before the actual ambulatory monitoring and a post-questionnaire  
5 (adapted version of the UEQ) afterwards, measuring the user experience of the applied  
6 software. In addition to a short socio-demographic questionnaire, participants will fill in an  
7 electronic version of the following questionnaires:  
8  
9  
10

11 **SCL90-R:** The symptom checklist (German version) is a measure of general psycho-  
12 pathological symptom severity and has been widely used in studies and clinical practice.[30]  
13 Besides three global indices, the SCL90-R measures the intensity of specific symptom groups  
14 on nine subscales. The internal consistencies (Cronbach's alpha) for the scales are in the range  
15 of  $\alpha = 0.74$  and  $\alpha = 0.97$  and the test has shown a test-retest-reliability of  $r \geq 0.69$ . In a  
16 large German adolescent survey, the SCL90-R showed a high general validity for the use as  
17 an instrument for measuring general symptom burden.[31] The manual of the SCL90-R  
18 proposes a cut-off at  $T \geq 63$  at the global severity index for participants with a high symptom  
19 burden.  
20

21 **FEEL-KJ:** The FEEL-KJ is a German instrument for the measurement of emotion regulation  
22 of children and adolescents.[32] It measures multi-dimensional and emotion-specific emotion  
23 regulation strategies for the emotions anxiety, anger and grief providing both adaptive (e.g.  
24 cognitive problem-solving, acceptance) and maladaptive strategies (e.g. perseverance,  
25 resignation). Internal consistencies (Cronbach's alpha) for the two secondary strategies are  
26 good ( $\alpha = 0.82$  for maladaptive,  $\alpha = 0.93$  for adaptive strategies). Six week test-retest-  
27 reliabilities for all strategies are between  $r = 0.62$  and  $r = 0.81$ . Regarding construct  
28 validity, adaptive emotion regulation strategies show generally low correlations with  
29 maladaptive strategies which indicate independent secondary strategies. Factorial analysis  
30 supports the two component structure. Correlations with other scales show sufficient construct  
31 validity of the questionnaire.  
32

33 **UEQ:** The user experience questionnaire is a questionnaire primarily developed for  
34 measuring the usability of websites [33] and one of the few reliable scales for measuring  
35 usability. This is conducted by rating the website or application on various dimensions on a 7-  
36 point scale (e.g. if an application is rather attractive than unattractive, more creative than  
37 dull).  
38

39 The UEQ contains six subscales of different facets of user experience. Internal consistencies  
40 (Cronbach's alpha) for the German version of the subscales are between  $\alpha = 0.73$  and  $\alpha =$   
41  $0.89$ . Participants will fill in the UEQ after the ambulatory monitoring when they meet again  
42  
43  
44  
45  
46  
47  
48  
49  
50  
51  
52

1  
2  
3 with the study coordinator at the medical centre to copy the data from their smartphones. Due  
4 to technical reasons, this questionnaire will be provided as a paper-version.  
5  
6  
7

### 8 **Ambulatory Monitoring**

9  
10 Both groups will participate in an ambulatory monitoring for two days assessing data on their  
11 own smartphones after they have filled in a pre-questionnaire. The free data collecting  
12 software Epicollect [34] developed at the Imperial College London will be used on the  
13 participants' own devices. A screenshot of the application can be seen in Figure 2. After  
14 informing the participants about how to use the application, researchers will download the  
15 software and the questionnaire form on the smartphone and arrange the individual sleeping  
16 periods with the participants when they will not be asked for data entry. Data will be assessed  
17 during school days only, to prevent confounding the data by subjects who participate on  
18 weekends. Earlier studies [9] suggest that a two-day monitoring provides sufficient data for  
19 analysis without the risk of loss of interest.  
20  
21

22  
23 During the 48 hours of the monitoring, participants will receive hourly text messages to their  
24 mobile phones which prompt to fill in the questionnaire. The questionnaire consists of four  
25 items which can be seen in Table 2.  
26  
27  
28  
29  
30  
31  
32  
33  
34  
35  
36  
37  
38  
39  
40  
41  
42  
43  
44  
45  
46  
47  
48  
49  
50  
51  
52  
53  
54  
55  
56  
57  
58  
59  
60

**Table 2. Items, answer categories and outcome variables of the ambulatory monitoring questionnaire**

| Item (original German version)                                                                                                                                                                                                                 | answer category                                                 | outcome variable          |
|------------------------------------------------------------------------------------------------------------------------------------------------------------------------------------------------------------------------------------------------|-----------------------------------------------------------------|---------------------------|
| On a scale from 0 – not present to 100 – extremely intense, at this time, how intense is your emotional tension?<br>(Auf einer Skala von 0 [nicht vorhanden] bis 100 [extreme stark], wie stark ist jetzt gerade deine emotionale Anspannung?) | 0 – 100, answered by filling in the number in a text field      | aversive tension          |
| On a scale from 0 – not at all to 9 – very good, how well can you name the emotion that you are feeling right now? (Auf einer Skala von 0 [gar nicht] bis 9 [sehr gut], wie gut kannst Du die Emotion benennen, die Du gerade spuerst?)        | 0 to 9, answered by single choice in a drop down selection menu | ability to label emotions |
| Which emotion(s) are you experiencing right now? (Welche Emotion[en] verspuerst du gerade?)                                                                                                                                                    | open text field                                                 | emotions                  |
| What have you done immediately before responding to the questions? (Was hast du kurz vor dem Beantworten der Fragen gemacht?)                                                                                                                  | open text field                                                 | occupation                |

**Sample-size calculation**

In this study, aversive emotional tension is scored between zero and 100. An earlier study [9] compared the experienced aversive tension of patients with BPD with mentally healthy control subjects finding that the adult control subjects reported mean values of tension near zero on a scale from zero to nine. In another study, Ebner-Priemer *et al.* [10] used a scale from zero to ten to measure aversive tension. Different from them, we will use a broader scale (zero to 100) as used in DBT manuals.[7, 25] Furthermore, we will examine adolescent subjects who might experience more aversive tension than adults. Therefore, we expect slightly increased mean levels and variances of aversive tension compared to the former mentioned study both in patient and control group. We expect an effect size of  $d \geq 0.8$  to be a

1  
2  
3 clinically relevant.[35] As to the best knowledge of the investigators, there is no literature on  
4 the experience of aversive tension neither of individuals with a history of AN nor of  
5 adolescents. Hence, based on previous findings regarding adults and BPD[9], we suppose  
6 mean levels of 60 (patient group;  $SD_{\text{patients}} = 20$ ) and 40 (control group,  $SD_{\text{controls}} = 15$ )  
7 regarding aversive tension. To achieve a statistical power of 80% of a two-sided t-test, a  
8 group sample size of at least 16 subjects (with  $\alpha = 0.05/2$  for testing two separate  
9 hypotheses, two-sided test) will be necessary. Furthermore, we will calculate with an  
10 overhead of 25% and therefore include at least 20 subjects in each group.  
11  
12  
13  
14  
15  
16  
17

### 18 **Statistical analyses**

19 Data will be assessed using SPSS software (version 21; SPSS Inc., Chicago, IL, USA).  
20 Correctness of the paper-submitted data will be assured by double-entry of the data. All three  
21 hypotheses will be tested separately. To ensure a global alpha error of  $\alpha = 0.05$ , we will  
22 adjust with the Holm procedure by organizing hypotheses regarding their obtained *p*-  
23 values.[36]  
24  
25  
26  
27

28 To test for group differences in aversive tension (1), we will first conduct mean values of  
29 aversive tension for every participant. Group means of patient and control group will then be  
30 tested using Welch's *t*-test for unequal variances. For hypothesis (2), we will test for  
31 differences in the reported individual maximum values using the non-parametric Mann-  
32 Whitney *U*-test.  
33  
34  
35

36 On an exploratory level we will analyse the time course of aversive tension, its relation to the  
37 ability to label emotions and possible group differences regarding the valence of named  
38 emotions. We will then analyse differences regarding the compliance (missing values).  
39 Furthermore, we will group the named emotions in positive and negative to compute an index  
40 of valence. Regarding the usability of the method, we will analyse the reported usability of the  
41 software.  
42  
43  
44  
45  
46  
47

### 48 **ETHICS AND DISSEMINATION**

49 The ethics committee of the regional medical association in Mainz, Germany approved the  
50 study protocol under the reference number 837.177.13 and the study will be conducted  
51 according to the Helsinki Declaration. Data protection protocol was approved by the  
52 commissioner for data protection of the Rheinhessen-Fachklinik Mainz, Germany.  
53 Participation will require informed consent by participants and legal guardians in case of  
54  
55  
56  
57  
58  
59  
60

1  
2  
3 minority. Participants and legal guardians can withdraw from the study at any time without  
4 further explanation and any negative consequences.

5  
6 Results will be disseminated through peer-reviewed publications and presentations at  
7 conferences.  
8  
9

## 10 11 12 **DISCUSSION**

13  
14 In this protocol we have presented the first controlled trial for studying aversive tension in  
15 patients with AN in an ambulatory monitoring setting. Thereby, the experience of aversive  
16 tension in patients with AN and adolescent control participants will be observed hourly in a  
17 48 hour monitoring using the participants' own devices. We hope that our study will provide  
18 data for a better understanding of how aversive tension and emotion regulation are part of this  
19 specific eating disorder. In contrast to paper based documentation, the presented concept is an  
20 advantage due to reduced reminding efforts and recall bias. The achieved result of this trial  
21 will furthermore have direct relevance for DBT and will be a basis for further research  
22 regarding efficiency and therapy outcomes of DBT for AN.  
23  
24

25 Due to the ambulatory monitoring design, there are some limitations of the study such as  
26 observance of outpatients only, as inpatients might experience stronger states of aversive  
27 tension. Conversely, comparing outpatients and control participants allows us to collect data  
28 in a daily life setting including school times.  
29

30 An additional challenge is the technical aspect of the ambulatory monitoring. As the software  
31 was not designed for ambulatory monitoring purposes in particular, the handling is somewhat  
32 more complex in than a simple paper-based diary or an expensive commercial software  
33 solution. However, we expect that the possible benefits, such as more privacy during filling in  
34 the items, of the software will outweigh any possible drawbacks. If the usability outcomes are  
35 positive, this might encourage other researchers to use this free available application or to  
36 further develop it, therefore making it more suitable for ambulatory monitoring purposes, e.g.  
37 by implementing a notification function. The principle of using the smartphone as a tool in  
38 therapy for promptly self-reflection has to be developed in further investigations. A transfer of  
39 the concept to further conditions and disorders is welcomed.  
40  
41

42 After this trial has been successfully conducted and if a difference in the experience of  
43 aversive tension of patients with AN compared to control participants has been observed,  
44 effects of DBT for patients with AN or adolescents patients in general on aversive tension  
45 could be investigated more thoroughly.  
46  
47  
48  
49  
50  
51  
52  
53  
54  
55  
56  
57  
58  
59  
60

## COMPETING INTERESTS

The authors declare that they have no competing interests.

## CONTRIBUTORS

DK carries out the acquisition of data, participated in the design of the study and coordination and drafted the manuscript. AB and FH conceived the study, participated in its design and revised the manuscript. EJ participated in the design of the study and coordination and helped to draft the manuscript. All authors read and approved the final manuscript.

## ACKNOWLEDGEMENTS

All authors are employees of the Department of Child and Adolescent Psychiatry and Psychotherapy Mainz (Prof. Dr. Michael Huss), a collaboration unit between Universitaetsmedizin at the Johannes-Gutenberg-Universitaet and Rheinhessen Fachklinik at the Landeskrankenhaus Rheinland-Pfalz. PD. Dr. Kristian Holtkamp is head of the DRK-Fachklinik Bad Neuenahr. We are thankful to Prof. Dr. Eva Möhler and Andrea Dixius of the Department of Child and Adolescent Psychiatry and Psychotherapy at the SHG Klinik Idar-Oberstein for their participation in the development of this study. Patricia Meinhardt conducted proof reading. We are further thankful to all participants.

## FUNDING

This research received no specific grant from any funding agency in the public, commercial or not-for-profit sectors.

## REFERENCES

- 1 Zipfel S, Löwe B, Reas DL, et al. Long-term prognosis in anorexia nervosa: lessons from a 21-year follow-up study. *The Lancet* 2000;**355**:721–722.
- 2 Berkman ND, Lohr KN, Bulik CM. Outcomes of eating disorders: A systematic review of the literature. *Int J Eat Disord* 2007;**40**:293–309.
- 3 Zipfel S, Wild B, Groß G, et al. Focal psychodynamic therapy, cognitive behaviour therapy, and optimised treatment as usual in outpatients with anorexia nervosa (ANTOP study): randomised controlled trial. *The Lancet*. Published Online First: 14 October 2013. doi:10.1016/S0140-6736(13)61746-8
- 4 Schmidt U, Renwick B, Lose A, et al. The MOSAIC study - comparison of the Maudsley Model of Treatment for Adults with Anorexia Nervosa (MANTRA) with Specialist Supportive Clinical Management (SSCM) in outpatients with anorexia nervosa or eating disorder not otherwise specified, anorexia nervosa type: study protocol for a randomized controlled trial. *Trials* 2013;**14**:160.
- 5 Sipos V, Bohus M, Schweiger U. Dialektisch-behaviorale Therapie für Essstörungen (DBT-E). *Psychother Psychosom Med Psychol* 2011;**61**(02):87–91.
- 6 Linehan MM. *Cognitive-behavioral treatment of borderline personality disorder*. New York: Guilford Press 1993a.
- 7 Linehan MM. *Skill training manual for treating borderline personality disorder*. New York: Guilford Press 1993b.
- 8 Stiglmayr CE, Shapiro DA, Stieglitz RD, et al. Experience of aversive tension and dissociation in female patients with borderline personality disorder — a controlled study. *J Psychiatr Res* 2001;**35**:111–118.
- 9 Stiglmayr CE, Grathwol T, Linehan MM, et al. Aversive tension in patients with borderline personality disorder: a computer-based controlled field study. *Acta Psychiatr Scand* 2005;**111**:372–379.
- 10 Ebner-Priemer UW, Kuo J, Schlotz W, et al. Distress and Affective Dysregulation in Patients With Borderline Personality Disorder. *J Nerv Ment Dis* 2008;**196**:314–320.
- 11 Zanarini MC, Frankenburg FR, DeLuca CJ, et al. The Pain of Being Borderline: Dysphoric States Specific to Borderline Personality Disorder. *Harv Rev Psychiatry* 1998;**6**:201–207.
- 12 Haynos AF, Fruzzetti AE. Anorexia Nervosa as a Disorder of Emotion Dysregulation: Evidence and Treatment Implications. *Clin Psychol* 2011;**18**:183–202.
- 13 Coid J. An affective syndrome in psychopaths with Borderline Personality-Disorder. *Br J Psychiatry* 1993;**162**:641–650.
- 14 Wolff S, Stiglmayr C, Bretz HJ, et al. Emotion identification and tension in female patients with borderline personality disorder. *Br J Clin Psychol* 2007;**46**:347–360.
- 15 Russell JA. A Circumplex Model of Affect. *J Pers Soc Psychol* 1980;**39**:1161–1178.
- 16 Brown MZ, Comtois KA, Linehan MM. Reasons for suicide attempts and nonsuicidal self-injury in women with borderline personality disorder. *J Abnorm Psychol* 2002;**111**:198–202.
- 17 Reitz S, Krause-Utz A, Pogatzki-Zahn EM, et al. Stress Regulation and Incision in Borderline Personality Disorder—A Pilot Study Modeling Cutting Behavior. *J Pers Disord* 2012;**26**(4):605–615.
- 18 Chapman AL, Gratz KL, Brown MZ. Solving the puzzle of deliberate self-harm: The experiential avoidance model. *Behav Res Ther* 2006;**44**:371–394.
- 19 Fruzzetti AE, Shenk C, Hoffman PD. Family interaction and the development of borderline personality disorder: A transactional model. *Dev Psychopathol* 2005;**17**:1007–1030.

- 1  
2  
3 20 Brockmeyer T, Grosse Holtforth M, Bents H, et al. Starvation and emotion regulation in  
4 anorexia nervosa. *Compr Psychiatr* 2012;**53**:496–501.
- 5 21 Salbach-Andrae H, Bohnkamp I, Bierbaum T, et al. Dialektisch Behaviorale Therapie  
6 (DBT) und Kognitiv Behaviorale Therapie (CBT) für Jugendliche mit Anorexia und  
7 Bulimia nervosa im Vergleich. *Kindheit und Entwicklung* 2009;**18**:180–190.
- 8 22 Kröger C, Schweiger U, Sipos V, et al. Dialectical behaviour therapy and an added  
9 cognitive behavioural treatment module for eating disorders in women with borderline  
10 personality disorder and anorexia nervosa or bulimia nervosa who failed to respond to  
11 previous treatments. An open trial with a 15-month follow-up. *J Behav Ther Exp*  
12 *Psychiatry* 2010;**41**:381–388.
- 13 23 Federici A, Wisniewski L. An intensive DBT program for patients with multidagnostic  
14 eating disorder presentations: A case series analysis. *Int J Eat Disord* 2013;**46**:322–331.
- 15 24 Miller AL, Rathus JH, Linehan M. *Dialectical behavior therapy with suicidal adolescents*.  
16 New York: Guilford Press 2007.
- 17 25 Fleischhaker C, Sixt B, Schulz E. *DBT-A: Dialektisch-behaviorale Therapie für*  
18 *Jugendliche*. Berlin: Springer 2011.
- 19 26 Fahrenberg J, Myrtek M, Pawlik K, et al. Ambulatory Assessment - Monitoring Behavior  
20 in Daily Life Settings. *Eur J Psychol Assess* 2007;**23**:206–213.
- 21 27 Kubiak T, Krog K. Computerized Sampling of Experience and Behavior. In: Mehl MR,  
22 Conner TS, eds. *Handbook of research methods for studying daily life*. New York:  
23 Guilford 2011.
- 24 28 Kjelsås E, Bjørnstrøm C, Gøtestam KG. Prevalence of eating disorders in female and male  
25 adolescents (14–15 years). *Eat Behav* 2004;**5**:13–25.
- 26 29 Hilbert A, Buerger A, Hartmann AS, et al. Psychometric Evaluation of the Eating  
27 Disorder Examination Adapted for Children. *Eur Eat Disord Rev* 2013;**21**:330–339.
- 28 30 Franke GH. SCL-90-R. *Die Symptom-Checkliste von Derogatis - Deutsche Version*.  
29 Göttingen: Beltz Test 1995.
- 30 31 Essau CA, Groen G, Conradt J, et al. Validität und Reliabilität der SCL-90-R: Ergebnisse  
31 der Bremer Jugendstudie. *Zeitschrift für Differentielle und Diagnostische Psychologie*  
32 2001;**22**:139–152.
- 33 32 Grob A, Smolenski C. *Fragebogen zur Erhebung der Emotionsregulation bei Kindern und*  
34 *Jugendlichen (FEEL-KJ)*. Bern: Verlag Hans Huber 2005.
- 35 33 Laugwitz B, Held T, Schrepp M. Construction and Evaluation of a User Experience  
36 Questionnaire. In: Holzinger A, ed. *HCI and Usability for Education and Work*. Berlin:  
37 Springer 2008:63–76.
- 38 34 Aanensen DM, Huntley DM, Feil EJ, et al. EpiCollect: Linking Smartphones to Web  
39 Applications for Epidemiology, Ecology and Community Data Collection. *PLoS ONE*  
40 2009;**4**(9).
- 41 35 Cohen J. *Statistical power analysis for the behavioral sciences*. 2nd edn. Hillsdale: L.  
42 Erlbaum Associates 1988.
- 43 36 Holm S. A Simple Sequentially Rejective Multiple Test Procedure. *Scandinavian Journal*  
44 *of Statistics. Scand Stat Theory Appl* 1979;**6**:65–70.
- 45  
46  
47  
48  
49  
50  
51  
52  
53  
54  
55  
56  
57  
58  
59  
60



**FIGURES**

Figure 1. – Study schedule

Figure 2. – Ambulatory monitoring questionnaire as seen in the smartphone application

For peer review only

1  
2  
3  
4  
5  
6  
7  
8  
9  
10  
11  
12  
13  
14  
15  
16  
17  
18  
19  
20  
21  
22  
23  
24  
25  
26  
27  
28  
29  
30  
31  
32  
33  
34  
35  
36  
37  
38  
39  
40  
41  
42  
43  
44  
45  
46  
47  
48  
49  
50  
51  
52  
53  
54  
55  
56  
57  
58  
59  
60

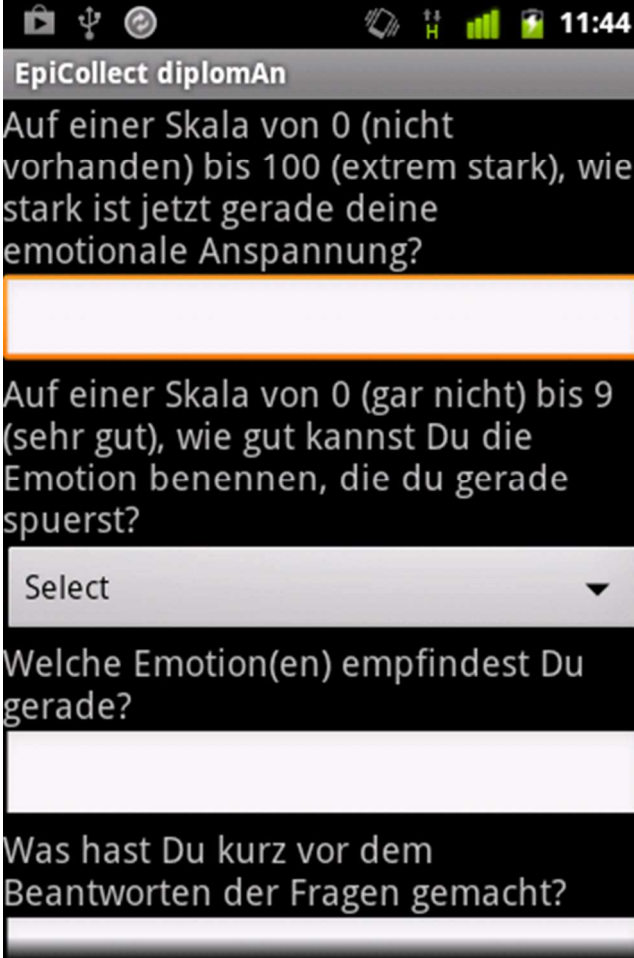

The screenshot shows the EpiCollect diplomAn application interface. At the top, there is a status bar with icons for camera, USB, rotation, signal strength, battery, and the time 11:44. Below the status bar is a header bar with the text "EpiCollect diplomAn". The main content area contains four questions, each followed by an input field:

- Question 1: "Auf einer Skala von 0 (nicht vorhanden) bis 100 (extrem stark), wie stark ist jetzt gerade deine emotionale Anspannung?" followed by a text input field.
- Question 2: "Auf einer Skala von 0 (gar nicht) bis 9 (sehr gut), wie gut kannst Du die Emotion benennen, die du gerade spuerst?" followed by a dropdown menu with the text "Select".
- Question 3: "Welche Emotion(en) empfindest Du gerade?" followed by a text input field.
- Question 4: "Was hast Du kurz vor dem Beantworten der Fragen gemacht?" followed by a text input field.

Figure 2. Ambulatory monitoring questionnaire as seen in the smartphone application

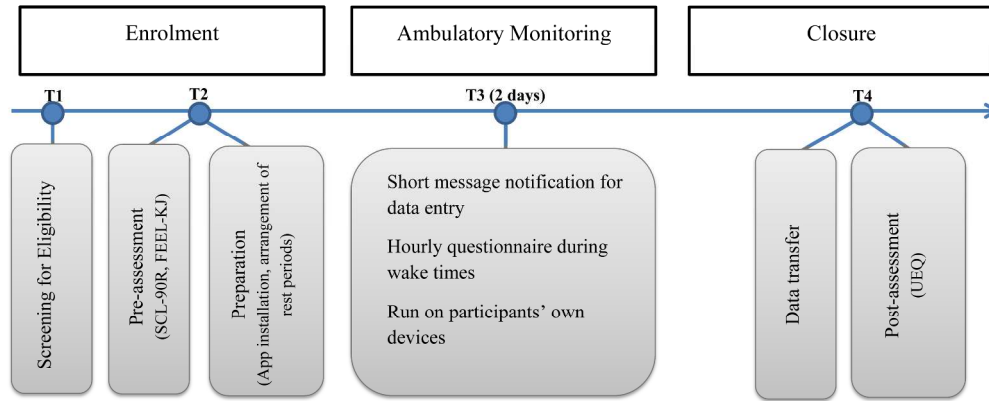

Figure 1. Study schedule  
253x114mm (300 x 300 DPI)

Peer review only

1  
2  
3  
4  
5  
6  
7  
8  
9  
10  
11  
12  
13  
14  
15  
16  
17  
18  
19  
20  
21  
22  
23  
24  
25  
26  
27  
28  
29  
30  
31  
32  
33  
34  
35  
36  
37  
38  
39  
40  
41  
42  
43  
44  
45  
46  
47  
48  
49  
50  
51  
52  
53  
54  
55  
56  
57  
58  
59  
60

# BMJ Open

## Aversive tension of adolescents with anorexia nervosa in daily course: A case-controlled and smartphone-based ambulatory monitoring trial (SMART)

|                                 |                                                                                                                                                                                                                                                                                                                                                                                                                                                                                                                                                                                                  |
|---------------------------------|--------------------------------------------------------------------------------------------------------------------------------------------------------------------------------------------------------------------------------------------------------------------------------------------------------------------------------------------------------------------------------------------------------------------------------------------------------------------------------------------------------------------------------------------------------------------------------------------------|
| Journal:                        | <i>BMJ Open</i>                                                                                                                                                                                                                                                                                                                                                                                                                                                                                                                                                                                  |
| Manuscript ID:                  | bmjopen-2013-004703.R1                                                                                                                                                                                                                                                                                                                                                                                                                                                                                                                                                                           |
| Article Type:                   | Protocol                                                                                                                                                                                                                                                                                                                                                                                                                                                                                                                                                                                         |
| Date Submitted by the Author:   | 27-Mar-2014                                                                                                                                                                                                                                                                                                                                                                                                                                                                                                                                                                                      |
| Complete List of Authors:       | Kolar, David; Johannes-Gutenberg-Universitaet Mainz, Department for Child and Adolescent Psychiatry and Psychotherapy<br>Bürger, Arne; Johannes-Gutenberg-Universitaet Mainz, Department for Child and Adolescent Psychiatry and Psychotherapy<br>Hammerle, Florian; Johannes-Gutenberg-Universitaet Mainz, Department for Child and Adolescent Psychiatry and Psychotherapy<br>Jenetzky, Ekkehart; Johannes-Gutenberg-Universitaet Mainz, Department for Child and Adolescent Psychiatry and Psychotherapy; German Cancer Research Center, Division of Clinical Epidemiology and Aging Research |
| <b>Primary Subject Heading</b>: | Mental health                                                                                                                                                                                                                                                                                                                                                                                                                                                                                                                                                                                    |
| Secondary Subject Heading:      | Paediatrics                                                                                                                                                                                                                                                                                                                                                                                                                                                                                                                                                                                      |
| Keywords:                       | Child & adolescent psychiatry < PSYCHIATRY, Eating disorders < PSYCHIATRY, MENTAL HEALTH, Personality disorders < PSYCHIATRY                                                                                                                                                                                                                                                                                                                                                                                                                                                                     |
|                                 |                                                                                                                                                                                                                                                                                                                                                                                                                                                                                                                                                                                                  |

SCHOLARONE™  
Manuscripts

only

## Title page

Title: Aversive tension of adolescents with anorexia nervosa in daily course: A case-controlled and smartphone-based ambulatory monitoring trial (SMART)

David Raphael Kolar<sup>1</sup>, Arne Bürger<sup>1\*</sup>, Florian Hammerle<sup>1</sup>, Ekkehart Jenetzky<sup>1,2</sup>

1. Department for Child and Adolescent Psychiatry and Psychotherapy, Johannes-Gutenberg-University Mainz, Langenbeckstr. 1, D 55131 Mainz, Germany
2. Division of Clinical Epidemiology and Aging Research, German Cancer Research Center, Im Neuenheimer Feld 581, D 69120 Heidelberg, Germany

\*Corresponding author:

arne.buerger@unimedizin-mainz.de

Telephone: +49 6131 17-3282

Telefax: +49 6131 17-5580

## Word Count

3340

## Keywords

Aversive tension, anorexia nervosa, smartphone, ambulatory monitoring, dialectical behaviour therapy (DBT)

## Abstract

**Introduction:** Monitoring and reduction of aversive tension is a core issue in dialectical behaviour therapy of patients. It has been shown that aversive tension is increased in adult borderline personality disorder and is linked to low emotion labelling ability. However, until now there is no documented evidence that patients with anorexia nervosa suffer from aversive tension as well. Furthermore the usability of a smartphone application for ambulatory monitoring purposes has not been sufficiently explored.

**Methods and analysis:** We compare the mean and maximum self-reported aversive tension in 20 female adolescents (12-19 years) with anorexia nervosa in out-patient treatment with 20 healthy controls. They are required to answer hourly, over a two day period, i.e. about 30 times, four short questions on their smartphone, which ensures prompt documentation without any recall bias. At the close-out, the participants give a structured usability feedback on the application and the procedure.

**Ethics and dissemination:** The achieved result of this trial has direct relevance for efficient therapy strategies and is a prerequisite for trials regarding dialectical behaviour therapy in anorexia nervosa. The results will be disseminated through peer-review publications. The ethics committee of the regional medical association in Mainz, Germany approved the study protocol under the reference number 837.177.13.

**Registration details:** The trial is registered at the German clinical trials registration under the reference number DRKS00005228.

**STRENGTHS AND LIMITATIONS OF THIS STUDY**

- First controlled trial observing aversive tension in individuals with anorexia nervosa
- Momentary assessment for recognition bias reduction
- Using the personal smartphone devices of the participants for better compliance and fewer participation burden than in a trial using paper-based assessment methods
- Due to the ambulatory monitoring design, only out-patients can participate
- The monitoring software was not primarily developed for ambulatory monitoring trials and therefore the usability could be improved

For peer review only

## INTRODUCTION

Anorexia nervosa (AN) is a very severe disorder with the highest lethality in mental disorders [1]. Due to the often less than promising therapy outcomes,[2] new ways to treat AN is still a developing research topic.[3, 4] Recently, an adaptation of the dialectical behaviour therapy (DBT) for the treatment of eating disorders has been made,[5] which was originally developed by Marsha Linehan [6, 7] for the treatment of chronically suicidal patients with borderline personality disorder (BPD). DBT focuses mainly on emotion regulation problems as the core reason for BPD. In line with this model, commitment to changing dysfunctional behaviour, direct contact to therapists in acute crisis, e.g. telephone coaching, and understanding of aversive tension as a consequence of missing emotion regulation strategies are therefore important parts of DBT. As DBT is currently discussed as a possible treatment solution for AN,[5] empirical research on the importance of its core assumptions (inter alia emotion dysregulation, aversive tension) in AN is clearly needed.

In regard to BPD, states of aversive tension have been reported previously.[8–11] Although in literature those states have been described using many different terms such as "psychological distress",[10] "heightened emotional arousal",[12] "tension",[13] or "aversive tension",[9, 14] we will use the term "aversive tension" for clarity reasons. Aversive tension refers to an emotional state that is perceived as negative and normally attended by high arousal,[15] but is not linked to a specific emotion. Hence the experience of aversive tension urges the subject to terminate this state immediately. Patients with BPD often use nonsuicidal self-injury (NSSI) as a maladaptive strategy to reduce aversive tension [16, 17] and to feel rapid relief from corresponding negative emotions.[18]

There are studies examining actual perceived aversive tension of patients with BPD.[8–10] Using ambulatory monitoring methods in two of their studies, both research groups could show that patients with BPD differ in the experience of aversive tension from healthy controls regarding mean levels and variation over time (higher levels, more frequent and rapid increases, longer persistence and slower refraction of aversive tension). Stiglmayr *et al.* [9] could also examine that applied DBT skills led to a reduction of aversive tension. Moreover, states of high aversive tension seem to be linked to an inability to label emotions at the same time, but only for patients with BPD.[10, 14] Even the previous value of aversive tension seems to be in some way related to emotion identification difficulties one hour later,[14] which suggests that aversive tension impairs the ability to name experienced emotions immediately and for a certain time span.



1  
2  
3 The previous mentioned findings are in line with the transactional model of BPD proposed by  
4 Fruzzetti *et al.*, [19] understanding BPD as an disorder of emotion regulation. Clear and brief,  
5 biological vulnerability together with invalidating responses from others regarding the  
6 emotional state of the subject will lead to aversive tension. To reduce these states of aversive  
7 tension, patients with BPD will then most likely use dysfunctional emotion regulation  
8 strategies like NSSI. Recently Haynos *et al.* [12] adapted this model for AN, emphasising the  
9 idea that AN is also a disorder of emotion regulation. They suggest that a person with AN will  
10 experience aversive tension especially after events related to food intake or body exposure.  
11 Instead of using NSSI as an emotion regulation strategy like patients with BPD, persons  
12 suffering from AN will tend to excessive exercising (after food intake) or starvation behaviour  
13 (after e.g. body exposure, criticism by intimates) for a brief reduction in arousal. This will  
14 thereby lead, via negative reinforcement, to a circulus vitiosus with more frequent starvation  
15 behaviour and body weight reduction. This is supported by a recent study relating lower body  
16 mass indices in women with acute AN to fewer emotion regulation problems, although this  
17 association was not observed in other sub-samples.[20]

18 Although clinical practice indicates that patients with AN benefit from DBT skills training,  
19 empirical research is still scarce. So far, there has been only one controlled trial conducted  
20 comparing DBT with treatment as usual (TAU) in adolescent patients with AN.[21] Few pilot  
21 studies on adapted DBT programmes for patients with AN and a co-morbid BPD exist,[22,  
22 23] but all of these findings are promising regarding the effectiveness of DBT in the therapy  
23 of AN. As previously mentioned, DBT focuses on emotion regulation. The previous studies  
24 regarding DBT treatment of AN suppose by adopting DBT for AN that emotion regulation  
25 problems and aversive tension are the main factors for starvation behaviour, but surprisingly  
26 the occurrence of aversive tension in AN was never questioned in an empirical study before.  
27 Neither is there any literature on the experience of aversive tension of adolescents, although  
28 DBT manuals for the treatment of adolescents with high risk for NSSI have been published  
29 recently.[24, 25] Regarding the inability to label emotions, it is also unclear if this is a specific  
30 BPD problem, a general psychopathology phenomenon or a consequence of aversive tension.  
31 Therefore, the main aim of this study is to show if adolescent patients with AN differ from  
32 control subjects in their report of experienced aversive tension. Additionally, we will  
33 investigate a possible relation to the ability to label emotions on an exploratory level.

34 In the past the observance of mood or behaviour in everyday life was mostly conducted by  
35 filling in paper-based diaries or more recently by using hand-held computers distributed by  
36 the research group.[26] Due to the lack of high quality and reasonably priced software,  
37  
38  
39  
40  
41  
42  
43  
44  
45  
46  
47  
48  
49  
50  
51  
52  
53  
54  
55  
56  
57  
58  
59  
60

usually the programming for the hand-held computer devices was done by the researcher himself. Currently, the wide distribution of smartphone devices especially in the population of adolescents offers a new way for an ambulatory monitoring of mood changes in daily course. For the most common smartphone software, Android® and iOS®, there are low priced and user-friendly monitoring software solutions available.[27] The benefit of using the subjects' own devices may not only be the lower research costs. Especially in the research with adolescent subjects, a software application run on their smartphone instead of a less accessible and old fashioned research device could be preferred and lead to less missing data.

### **Aims**

The aim of this study is to investigate for the first time the experience of aversive tension of patients with an AN diagnosis. We hypothesize that in a period of two days the patient subsample will report (1) higher average values and (2) higher maximum values of aversive tension.

## **METHODS AND ANALYSIS**

The current study will be an observational case-control study with a sample size of at least 40 participants. Figure 1 provides a brief overview of the assessment schedule.

### **Participants and recruitment**

The study is taking place at the medical centre Rheinhessen-Fachklinik Mainz in cooperation with the Department of Child and Adolescent Psychiatry and Psychotherapy of the Universitaetsmedizin at the Johannes-Gutenberg Universitaet Mainz. The entity will invite outpatients with AN to participate in the study. Control subjects are recruited in the local region by word-of-mouth invitation of the study coordinator.

### **Inclusion and exclusion criteria**

Due to the low prevalence of AN in the male population [28] and to avoid confounding variables by gender, only female outpatients between 12 and 19 years with a current diagnosis of AN (according to the International Classification of Diseases, version 10; ICD-10) will be included. The diagnosis must be made by the outpatient clinic of the medical centre Rheinhessen-Fachklinik Mainz with the German version of the Eating Disorder Examination adapted for children (chEDE) [29], a structured interview for the assessment of eating disorders. Co-morbidity will be assessed with the German Kiddie-Sads-Present and Lifetime Version (K-SADS-PL), a reliable and valid semi-structured interview for the assessment of

mental disorders.[30] Participants of the patient group will be excluded in case of or presumed diagnosis of a personality disorder. In case of a BMI under the third percentile, patients will be referred to inpatient treatment and will not be included in the study. Other co-morbid disorders will be allowed if AN is the primary diagnosis. Control participants with any diagnosis of a mental disorder in the last five years will be excluded, as well as control participants with a high symptom burden based on the global severity index. For a summary of inclusion and exclusion criteria, see Table 1.

**Table 1. Summary of inclusion and exclusion criteria**

| Inclusion criteria          | Patient group                                             | Control group                                                                  |
|-----------------------------|-----------------------------------------------------------|--------------------------------------------------------------------------------|
| Gender                      | Female                                                    | female                                                                         |
| Age                         | 12 to 19 years                                            | 12 to 19 years                                                                 |
| Disorder                    | Diagnosis of Anorexia nervosa (F50.0), based on the chEDE | Healthy controls                                                               |
| Experience with smartphones | Existent                                                  | existent                                                                       |
| Exclusion criteria          |                                                           |                                                                                |
| Disorder                    | (presumed) diagnosis of a personality disorder            | any diagnosis of a mental disorder in the past five years                      |
|                             | BMI < 3 <sup>rd</sup> BMI-percentile                      | high symptom burden ( $T \geq 63$ on the global severity index of the SCL90-R) |

### Primary and secondary outcomes

The primary outcome of the study is the mean value of aversive tension; co-primary is the maximum value of aversive tension.

Main secondary outcome is the daily course of aversive tension (e.g. increases, decreases), the ability to label emotions, and reported emotions and occupations. To assess the acceptance of the method, we will report differences in the compliance of both groups.

In addition we will explore the usability of the smartphone application and the acceptance of using a personal smartphone. Influencing factors are socio-demographic data, mental symptom burden, emotion regulation strategies (FEEL-KJ) and the actual experienced emotion as well as the actual occupation at each assessment moment.

## Assessments

Both control subjects and patients will participate in a pre-questionnaire (socio-demographics, SCL90-R, FEEL-KJ) before the actual ambulatory monitoring and a post-questionnaire (adapted version of the UEQ) afterwards, measuring the user experience of the applied software. In addition to a short socio-demographic questionnaire, participants will fill in an electronic version of the following questionnaires:

**SCL90-R:** The symptom checklist (German version) is a measure of general psychopathological symptom severity and has been widely used in studies and clinical practice.[31] Besides three global indices, the SCL90-R measures the intensity of specific symptom groups on nine subscales. The internal consistencies (Cronbach's alpha) for the scales are in the range of  $\alpha = 0.74$  and  $\alpha = 0.97$  and the test has shown a test-retest-reliability of  $r \geq 0.69$ . In a large German adolescent survey, the SCL90-R showed a high general validity for the use as an instrument for measuring general symptom burden.[32] The manual of the SCL90-R proposes a cut-off at  $T \geq 63$  at the global severity index for participants with a high symptom burden.

**FEEL-KJ:** The FEEL-KJ is a German instrument for the measurement of emotion regulation of children and adolescents.[33] It measures multi-dimensional and emotion-specific emotion regulation strategies for the emotions anxiety, anger and grief providing both adaptive (e.g. cognitive problem-solving, acceptance) and maladaptive strategies (e.g. perseverance, resignation). Internal consistencies (Cronbach's alpha) for the two secondary strategies are good ( $\alpha = 0.82$  for maladaptive,  $\alpha = 0.93$  for adaptive strategies). Six week test-retest-reliabilities for all strategies are between  $r = 0.62$  and  $r = 0.81$ . Regarding construct validity, adaptive emotion regulation strategies show generally low correlations with maladaptive strategies which indicate independent secondary strategies. Factorial analysis supports the two component structure. Correlations with other scales show sufficient construct validity of the questionnaire.

**UEQ:** The user experience questionnaire is a questionnaire primarily developed for measuring the usability of websites [34] and one of the few reliable scales for measuring usability. This is conducted by rating the website or application on various dimensions on a 7-point scale (e.g. if an application is rather attractive than unattractive, more creative than dull).

The UEQ contains six subscales of different facets of user experience. Internal consistencies (Cronbach's alpha) for the German version of the subscales are between  $\alpha = 0.73$  and  $\alpha =$

1  
2  
3 0.89. Participants will fill in the UEQ after the ambulatory monitoring when they meet again  
4 with the study coordinator at the medical centre to copy the data from their smartphones. Due  
5 to technical reasons, this questionnaire will be provided as a paper-version.  
6  
7  
8

### 9 10 **Ambulatory Monitoring**

11 Both groups will participate in an ambulatory monitoring for two days assessing data on their  
12 own smartphones after they have filled in a pre-questionnaire. The free data collecting  
13 software Epicollect [35] developed at the Imperial College London will be used on the  
14 participants' own devices. A screenshot of the application can be seen in Figure 2. After  
15 informing the participants about how to use the application, researchers will download the  
16 software and the questionnaire form on the smartphone and arrange the individual sleeping  
17 periods with the participants when they will not be asked for data entry. Additionally, the  
18 participants will receive a short briefing regarding aversive tension. The participants will be advised  
19 that aversive tension is a state of unpleasant and high arousal which is only randomly accompanied by  
20 a specific emotion in line with the DBT manuals.[7, 25] They will be told that on a scale from 0 to  
21 100, the range of 70 to 100 stands for high tension normally only experienced in traumatic situations.  
22 Furthermore, participants will be told to imagine two exemplary events and their respective range of  
23 aversive tension that could possibly be provoked by such events. Data will be assessed during  
24 school days only, to prevent confounding the data by subjects who participate on weekends.  
25 Earlier studies [9] suggest that a two-day monitoring provides sufficient data for analysis  
26 without the risk of loss of interest. During the 48 hours of the monitoring, participants will  
27 receive hourly text messages to their mobile phones which prompt to fill in the questionnaire.  
28 The questionnaire consists of four items which can be seen in Table 2.  
29  
30  
31  
32  
33  
34  
35  
36  
37  
38  
39  
40  
41  
42  
43  
44  
45  
46  
47  
48  
49  
50  
51  
52  
53  
54  
55  
56  
57  
58  
59  
60

**Table 2. Items, answer categories and outcome variables of the ambulatory monitoring questionnaire**

| Item (original German version)                                                                                                                                                                                                                 | answer category                                                 | outcome variable          |
|------------------------------------------------------------------------------------------------------------------------------------------------------------------------------------------------------------------------------------------------|-----------------------------------------------------------------|---------------------------|
| On a scale from 0 – not present to 100 – extremely intense, at this time, how intense is your emotional tension?<br>(Auf einer Skala von 0 [nicht vorhanden] bis 100 [extreme stark], wie stark ist jetzt gerade deine emotionale Anspannung?) | 0 – 100, answered by filling in the number in a text field      | aversive tension          |
| On a scale from 0 – not at all to 9 – very good, how well can you name the emotion that you are feeling right now? (Auf einer Skala von 0 [gar nicht] bis 9 [sehr gut], wie gut kannst Du die Emotion benennen, die Du gerade spuerst?)        | 0 to 9, answered by single choice in a drop down selection menu | ability to label emotions |
| Which emotion(s) are you experiencing right now? (Welche Emotion[en] verspuerst du gerade?)                                                                                                                                                    | open text field                                                 | emotions                  |
| What have you done immediately before responding to the questions? (Was hast du kurz vor dem Beantworten der Fragen gemacht?)                                                                                                                  | open text field                                                 | occupation                |

**Sample-size calculation**

In this study, aversive emotional tension is scored between zero and 100. An earlier study [9] compared the experienced aversive tension of patients with BPD with mentally healthy control subjects finding that the adult control subjects reported mean values of tension near zero on a scale from zero to nine. In another study, Ebner-Priemer *et al.* [10] used a scale from zero to ten to measure aversive tension. Different from them, we will use a broader scale (zero to 100) as used in DBT manuals.[7, 25] Furthermore, we will examine adolescent subjects who might experience more aversive tension than adults. Therefore, we expect slightly increased mean levels and variances of aversive tension compared to the former mentioned study both in patient and control group. We expect an effect size of  $d \geq 0.8$  to be a

1  
2  
3 clinically relevant.[36] As to the best knowledge of the investigators, there is no literature on  
4 the experience of aversive tension neither of individuals with a history of AN nor of  
5 adolescents. Hence, based on previous findings regarding adults and BPD[9], we suppose  
6 mean levels of 60 (patient group;  $SD_{\text{patients}} = 20$ ) and 40 (control group,  $SD_{\text{controls}} = 15$ )  
7 regarding aversive tension. To achieve a statistical power of 80% of a two-sided t-test, a  
8 group sample size of at least 16 subjects (with  $\alpha = 0.05/2$  for testing two separate  
9 hypotheses, two-sided test) will be necessary. Furthermore, we will calculate with an  
10 overhead of 25% and therefore include at least 20 subjects in each group.  
11  
12  
13  
14  
15  
16

### 17 18 **Statistical analyses**

19 Data will be assessed using SPSS software (version 21; SPSS Inc., Chicago, IL, USA).  
20 Correctness of the paper-submitted data will be assured by double-entry of the data. All three  
21 hypotheses will be tested separately. To ensure a global alpha error of  $\alpha = 0.05$ , we will  
22 adjust with the Holm procedure by organizing hypotheses regarding their obtained *p*-  
23 values.[37]  
24  
25  
26  
27

28 To test for group differences in aversive tension (1), we will first conduct mean values of  
29 aversive tension for every participant. Group means of patient and control group will then be  
30 tested using Welch's *t*-test for unequal variances. For hypothesis (2), we will test for  
31 differences in the reported individual maximum values using the non-parametric Mann-  
32 Whitney *U*-test.  
33  
34  
35

36 On an exploratory level we will analyse the time course of aversive tension, its relation to the  
37 ability to label emotions and possible group differences regarding the valence of named  
38 emotions. We will then analyse differences regarding the compliance (missing values).  
39 Furthermore, we will group the named emotions in positive and negative to compute an index  
40 of valence. Regarding the usability of the method, we will analyse the reported usability of the  
41 software.  
42  
43  
44  
45  
46  
47

### 48 **ETHICS AND DISSEMINATION**

49 The ethics committee of the regional medical association in Mainz, Germany approved the  
50 study protocol under the reference number 837.177.13 and the study will be conducted  
51 according to the Helsinki Declaration. Data protection protocol was approved by the  
52 commissioner for data protection of the Rheinhessen-Fachklinik Mainz, Germany.  
53 Participation will require informed consent by participants and legal guardians in case of  
54  
55  
56  
57  
58  
59  
60

1  
2  
3 minority. Participants and legal guardians can withdraw from the study at any time without  
4 further explanation and any negative consequences.

5  
6 Results will be disseminated through peer-reviewed publications and presentations at  
7 conferences.  
8

## 9 10 **DISCUSSION**

11  
12 In this protocol we have presented the first controlled trial for studying aversive tension in  
13 patients with AN in an ambulatory monitoring setting. Thereby, the experience of aversive  
14 tension in patients with AN and adolescent control participants will be observed hourly in a  
15 48 hour monitoring using the participants' own devices. We hope that our study will provide  
16 data for a better understanding of how aversive tension and emotion regulation are part of this  
17 specific eating disorder. In contrast to paper based documentation, the presented concept is an  
18 advantage due to reduced reminding efforts and recall bias. The achieved result of this trial  
19 will furthermore have direct relevance for DBT and will be a basis for further research  
20 regarding efficiency and therapy outcomes of DBT for AN.  
21

22  
23 Due to the ambulatory monitoring design, there are some limitations of the study such as  
24 observance of outpatients only, as inpatients might experience stronger states of aversive  
25 tension. Conversely, comparing outpatients and control participants allows us to collect data  
26 in a daily life setting including school times.

27  
28 A possible trigger for aversive tension in patients with AN might be meal situations. We  
29 decided to not assess the last food intake, as this might cause aversive tension itself and  
30 therefore confound the data. Additionally, there is no literature on which situations or  
31 emotions could trigger aversive tension in patients with AN. Therefore, we decided to conduct  
32 a naturalistic trial.  
33

34  
35 An additional challenge is the technical aspect of the ambulatory monitoring. As the software  
36 was not designed for ambulatory monitoring purposes in particular, the handling is somewhat  
37 more complex in than a simple paper-based diary or an expensive commercial software  
38 solution. However, we expect that the possible benefits, such as more privacy during filling in  
39 the items, of the software will outweigh any possible drawbacks. If the usability outcomes are  
40 positive, this might encourage other researchers to use this free available application or to  
41 further develop it, therefore making it more suitable for ambulatory monitoring purposes, e.g.  
42 by implementing a notification function. The principle of using the smartphone as a tool in  
43 therapy for promptly self-reflection has to be developed in further investigations. A transfer of  
44 the concept to further conditions and disorders is welcomed.  
45  
46  
47  
48  
49  
50  
51  
52  
53  
54  
55  
56  
57  
58  
59  
60



1  
2  
3 Regarding the statistical analysis, group comparisons of aggregated measures only permit  
4 analysis on one data level.[38] As in this study, we are primarily interested in a general group  
5 difference and not on interactions with other variables, standard group comparisons are the  
6 most economic statistical analysis regarding sample size and data structure requirements.  
7  
8 However, if group differences appear to be significant, subsequent analyses using more  
9 advanced techniques, e.g. graphical vector analysis [39] or mixed model approaches [38] are  
10 recommended.  
11

12  
13  
14 After this trial has been successfully conducted and if a difference in the experience of  
15 aversive tension of patients with AN compared to control participants has been observed, the  
16 relevance of aversive tension in other eating disorders could be examined and effects of DBT  
17 for patients with AN or adolescent patients in general on aversive tension could be  
18 investigated more thoroughly.  
19  
20  
21  
22

## 23 **COMPETING INTERESTS**

24  
25 The authors declare that they have no competing interests.  
26  
27

## 28 **CONTRIBUTORS**

29  
30 DK carries out the acquisition of data, participated in the design of the study and coordination  
31 and drafted the manuscript. AB and FH conceived the study, participated in its design and  
32 revised the manuscript. EJ participated in the design of the study and coordination and helped  
33 to draft the manuscript. All authors read and approved the final manuscript.  
34  
35  
36

## 37 **ACKNOWLEDGEMENTS**

38  
39 All authors are employees of the Department of Child and Adolescent Psychiatry and  
40 Psychotherapy Mainz (Prof. Dr. Michael Huss), a collaboration unit between  
41 Universitaetsmedizin at the Johannes-Gutenberg-Universitaet and Rheinessen Fachklinik at  
42 the Landeskrankenhaus Rheinland-Pfalz. We are thankful to Prof. Dr. Eva Möhler and Andrea  
43 Dixius of the Department of Child and Adolescent Psychiatry and Psychotherapy at the SHG  
44 Klinik Idar-Oberstein for their participation in the development of this study. Patricia  
45 Meinhardt conducted proof reading. We are further thankful to all participants.  
46  
47  
48  
49  
50  
51

## 52 **FUNDING**

53  
54 This research received no specific grant from any funding agency in the public, commercial or  
55 not-for-profit sectors.  
56  
57  
58  
59  
60

## REFERENCES

- 1 Zipfel S, Löwe B, Reas DL, et al. Long-term prognosis in anorexia nervosa: lessons from a 21-year follow-up study. *The Lancet* 2000;**355**:721–722.
- 2 Berkman ND, Lohr KN, Bulik CM. Outcomes of eating disorders: A systematic review of the literature. *Int J Eat Disord* 2007;**40**:293–309.
- 3 Zipfel S, Wild B, Groß G, et al. Focal psychodynamic therapy, cognitive behaviour therapy, and optimised treatment as usual in outpatients with anorexia nervosa (ANTOP study): randomised controlled trial. *The Lancet*. Published Online First: 14 October 2013. doi:10.1016/S0140-6736(13)61746-8
- 4 Schmidt U, Renwick B, Lose A, et al. The MOSAIC study - comparison of the Maudsley Model of Treatment for Adults with Anorexia Nervosa (MANTRA) with Specialist Supportive Clinical Management (SSCM) in outpatients with anorexia nervosa or eating disorder not otherwise specified, anorexia nervosa type: study protocol for a randomized controlled trial. *Trials* 2013;**14**:160.
- 5 Sipos V, Bohus M, Schweiger U. Dialektisch-behaviorale Therapie für Essstörungen (DBT-E). *Psychother Psychosom Med Psychol* 2011;**61**(02):87–91.
- 6 Linehan MM. *Cognitive-behavioral treatment of borderline personality disorder*. New York: Guilford Press 1993a.
- 7 Linehan MM. *Skill training manual for treating borderline personality disorder*. New York: Guilford Press 1993b.
- 8 Stiglmayr CE, Shapiro DA, Stieglitz RD, et al. Experience of aversive tension and dissociation in female patients with borderline personality disorder — a controlled study. *J Psychiatr Res* 2001;**35**:111–118.
- 9 Stiglmayr CE, Grathwol T, Linehan MM, et al. Aversive tension in patients with borderline personality disorder: a computer-based controlled field study. *Acta Psychiatr Scand* 2005;**111**:372–379.
- 10 Ebner-Priemer UW, Kuo J, Schlotz W, et al. Distress and Affective Dysregulation in Patients With Borderline Personality Disorder. *J Nerv Ment Dis* 2008;**196**:314–320.
- 11 Zanarini MC, Frankenburg FR, DeLuca CJ, et al. The Pain of Being Borderline: Dysphoric States Specific to Borderline Personality Disorder. *Harv Rev Psychiatry* 1998;**6**:201–207.
- 12 Haynos AF, Fruzzetti AE. Anorexia Nervosa as a Disorder of Emotion Dysregulation: Evidence and Treatment Implications. *Clin Psychol* 2011;**18**:183–202.
- 13 Coid J. An affective syndrome in psychopaths with Borderline Personality-Disorder. *Br J Psychiatry* 1993;**162**:641–650.
- 14 Wolff S, Stiglmayr C, Bretz HJ, et al. Emotion identification and tension in female patients with borderline personality disorder. *Br J Clin Psychol* 2007;**46**:347–360.
- 15 Russell JA. A Circumplex Model of Affect. *J Pers Soc Psychol* 1980;**39**:1161–1178.
- 16 Brown MZ, Comtois KA, Linehan MM. Reasons for suicide attempts and nonsuicidal self-injury in women with borderline personality disorder. *J Abnorm Psychol* 2002;**111**:198–202.
- 17 Reitz S, Krause-Utz A, Pogatzki-Zahn EM, et al. Stress Regulation and Incision in Borderline Personality Disorder—A Pilot Study Modeling Cutting Behavior. *J Pers Disord* 2012;**26**(4):605–615.
- 18 Chapman AL, Gratz KL, Brown MZ. Solving the puzzle of deliberate self-harm: The experiential avoidance model. *Behav Res Ther* 2006;**44**:371–394.
- 19 Fruzzetti AE, Shenk C, Hoffman PD. Family interaction and the development of borderline personality disorder: A transactional model. *Dev Psychopathol* 2005;**17**:1007–1030.

- 1  
2  
3 20 Brockmeyer T, Grosse Holtforth M, Bents H, et al. Starvation and emotion regulation in  
4 anorexia nervosa. *Compr Psychiatr* 2012;**53**:496–501.
- 5 21 Salbach-Andrae H, Bohnkamp I, Bierbaum T, et al. Dialektisch Behaviorale Therapie  
6 (DBT) und Kognitiv Behaviorale Therapie (CBT) für Jugendliche mit Anorexia und  
7 Bulimia nervosa im Vergleich. *Kindheit und Entwicklung* 2009;**18**:180–190.
- 8 22 Kröger C, Schweiger U, Sipos V, et al. Dialectical behaviour therapy and an added  
9 cognitive behavioural treatment module for eating disorders in women with borderline  
10 personality disorder and anorexia nervosa or bulimia nervosa who failed to respond to  
11 previous treatments. An open trial with a 15-month follow-up. *J Behav Ther Exp*  
12 *Psychiatry* 2010;**41**:381–388.
- 13 23 Federici A, Wisniewski L. An intensive DBT program for patients with multidagnostic  
14 eating disorder presentations: A case series analysis. *Int J Eat Disord* 2013;**46**:322–331.
- 15 24 Miller AL, Rathus JH, Linehan M. *Dialectical behavior therapy with suicidal adolescents*.  
16 New York: Guilford Press 2007.
- 17 25 Fleischhaker C, Sixt B, Schulz E. *DBT-A: Dialektisch-behaviorale Therapie für*  
18 *Jugendliche*. Berlin: Springer 2011.
- 19 26 Fahrenberg J, Myrtek M, Pawlik K, et al. Ambulatory Assessment - Monitoring Behavior  
20 in Daily Life Settings. *Eur J Psychol Assess* 2007;**23**:206–213.
- 21 27 Kubiak T, Krog K. Computerized Sampling of Experience and Behavior. In: Mehl MR,  
22 Conner TS, eds. *Handbook of research methods for studying daily life*. New York:  
23 Guilford 2011.
- 24 28 Kjelsås E, Bjørnstrøm C, Gøtestam KG. Prevalence of eating disorders in female and male  
25 adolescents (14–15 years). *Eat Behav* 2004;**5**:13–25.
- 26 29 Hilbert A, Buerger A, Hartmann AS, et al. Psychometric Evaluation of the Eating  
27 Disorder Examination Adapted for Children. *Eur Eat Disord Rev* 2013;**21**:330–339.
- 28 30 Delmo C, Weiffenbach O, Gabriel M, et al. *Kiddie-SADS - Present and Lifetime Version*  
29 *(K-SADS-PL): Deutsche Forschungsversion*. Frankfurt: University of Frankfurt/M 2001.
- 30 31 Franke GH. SCL-90-R. *Die Symptom-Checkliste von Derogatis - Deutsche Version*.  
31 Göttingen: Beltz Test 1995.
- 32 32 Essau CA, Groen G, Conradt J, et al. Validität und Reliabilität der SCL-90-R: Ergebnisse  
33 der Bremer Jugendstudie. *Zeitschrift für Differentielle und Diagnostische Psychologie*  
34 2001;**22**:139–152.
- 35 33 Grob A, Smolenski C. *Fragebogen zur Erhebung der Emotionsregulation bei Kindern und*  
36 *Jugendlichen (FEEL-KJ)*. Bern: Verlag Hans Huber 2005.
- 37 34 Laugwitz B, Held T, Schrepp M. Construction and Evaluation of a User Experience  
38 Questionnaire. In: Holzinger A, ed. *HCI and Usability for Education and Work*. Berlin:  
39 Springer 2008:63–76.
- 40 35 Aanensen DM, Huntley DM, Feil EJ, et al. EpiCollect: Linking Smartphones to Web  
41 Applications for Epidemiology, Ecology and Community Data Collection. *PLoS ONE*  
42 2009;**4**(9).
- 43 36 Cohen J. *Statistical power analysis for the behavioral sciences*. 2nd edn. Hillsdale: L.  
44 Erlbaum Associates 1988.
- 45 37 Holm S. A Simple Sequentially Rejective Multiple Test Procedure. *Scandinavian Journal*  
46 *of Statistics. Scand Stat Theory Appl* 1979;**6**:65–70.
- 47 38 Nezlek JB, Schröder-Abé M, Schütz A. Mehrebenenanalysen in der psychologischen  
48 Forschung. *Psychologische Rundschau* 2006;**4**:213–223.
- 49 39 Wild B, Eichler M, Friedrich HC, et al. A graphical vector autoregressive modeling  
50 approach to the analysis of electronic diary data. *BMC Med Res Methodol* 2010;**10**:28  
51  
52  
53  
54  
55  
56  
57  
58  
59  
60

**FIGURES**

Figure 1. – Study schedule

Figure 2. – Ambulatory monitoring questionnaire as seen in the smartphone application

For peer review only

1  
2  
3  
4  
5  
6  
7  
8  
9  
10  
11  
12  
13  
14  
15  
16  
17  
18  
19  
20  
21  
22  
23  
24  
25  
26  
27  
28  
29  
30  
31  
32  
33  
34  
35  
36  
37  
38  
39  
40  
41  
42  
43  
44  
45  
46  
47  
48  
49  
50  
51  
52  
53  
54  
55  
56  
57  
58  
59  
60

## Title page

Title: Aversive tension of adolescents with anorexia nervosa in daily course: A case-controlled and smartphone-based ambulatory monitoring trial (SMART)

David Raphael Kolar<sup>1</sup>, Arne Bürger<sup>1\*</sup>, Florian Hammerle<sup>1</sup>, Ekkehart Jenetzky<sup>1,2</sup>

1. Department for Child and Adolescent Psychiatry and Psychotherapy, Johannes-Gutenberg-University Mainz, Langenbeckstr. 1, D 55131 Mainz, Germany
2. Division of Clinical Epidemiology and Aging Research, German Cancer Research Center, Im Neuenheimer Feld 581, D 69120 Heidelberg, Germany

\*Corresponding author:

[arne.buerger@unimedizin-mainz.de](mailto:arne.buerger@unimedizin-mainz.de)

Telephone: +49 6131 17-3282

Telefax: +49 6131 17-5580

Field Code Changed

## Word Count

3340

## Keywords

Aversive tension, anorexia nervosa, smartphone, ambulatory monitoring, dialectical behaviour therapy (DBT)

## Abstract

**Introduction:** Monitoring and reduction of aversive tension is a core issue in dialectical behaviour therapy of patients. It has been shown that aversive tension is increased in adult borderline personality disorder and is linked to low emotion labelling ability. However, until now there is no documented evidence that patients with anorexia nervosa suffer from aversive tension as well. Furthermore the usability of a smartphone application for ambulatory monitoring purposes has not been sufficiently explored.

**Methods and analysis:** We compare the mean and maximum self-reported aversive tension in 20 female adolescents (12-19 years) with anorexia nervosa in out-patient treatment with 20 healthy controls. They are required to answer hourly, over a two day period, i.e. about 30 times, four short questions on their smartphone, which ensures prompt documentation without any recall bias. At the close-out, the participants give a structured usability feedback on the application and the procedure.

**Ethics and dissemination:** The achieved result of this trial has direct relevance for efficient therapy strategies and is a prerequisite for trials regarding dialectical behaviour therapy in anorexia nervosa. The results will be disseminated through peer-review publications. The ethics committee of the regional medical association in Mainz, Germany approved the study protocol under the reference number 837.177.13.

**Registration details:** The trial is registered at the German clinical trials registration under the reference number DRKS00005228.

**STRENGTHS AND LIMITATIONS OF THIS STUDY**

- First controlled trial observing aversive tension in individuals with anorexia nervosa
- Momentary assessment for recognition bias reduction
- Using the personal smartphone devices of the participants for better compliance and fewer participation burden than in a trial using paper-based assessment methods
- Due to the ambulatory monitoring design, only out-patients can participate
- The monitoring software was not primarily developed for ambulatory monitoring trials and therefore the usability ~~might be a little difficult~~could be improved

## INTRODUCTION

Anorexia nervosa (AN) is a very severe disorder with the highest lethality in mental disorders [1]. Due to the often less than promising therapy outcomes,[2] new ways to treat AN is still a developing research topic.[3, 4] Recently, an adaptation of the dialectical behaviour therapy (DBT) for the treatment of eating disorders has been made,[5] which was originally developed by Marsha Linehan [6, 7] for the treatment of chronically suicidal patients with borderline personality disorder (BPD). DBT focuses mainly on emotion regulation problems as the core reason for BPD. In line with this model, commitment to changing dysfunctional behaviour, direct contact to therapists in acute crisis, e.g. telephone coaching, and understanding of aversive tension as a consequence of missing emotion regulation strategies are therefore important parts of DBT. As DBT is currently discussed as a possible treatment solution for AN,[5] empirical research on the importance of its core assumptions (inter alia emotion dysregulation, aversive tension) in AN is clearly needed.

In regard to BPD, states of aversive tension have been reported previously.[8–11] Although in literature those states have been described using many different terms such as "psychological distress",[10] "heightened emotional arousal",[12] "tension",[13] or "aversive tension",[9, 14] we will use the term "aversive tension" for clarity reasons. Aversive tension refers to an emotional state that is perceived as negative and normally attended by high arousal,[15] but is not linked to a specific emotion. Hence the experience of aversive tension urges the subject to terminate this state immediately. Patients with BPD often use nonsuicidal self-injury (NSSI) as a maladaptive strategy to reduce aversive tension [16, 17] and to feel rapid relief from corresponding negative emotions.[18]

There are studies examining actual perceived aversive tension of patients with BPD.[8–10] Using ambulatory monitoring methods in two of their studies, both research groups could show that patients with BPD differ in the experience of aversive tension from healthy controls regarding mean levels and variation over time (higher levels, more frequent and rapid increases, longer persistence and slower refraction of aversive tension). Stiglmayr *et al.* [9] could also examine that applied DBT skills led to a reduction of aversive tension. Moreover, states of high aversive tension seem to be linked to an inability to label emotions at the same time, but only for patients with BPD.[10, 14] Even the previous value of aversive tension seems to be in some way related to emotion identification difficulties one hour later,[14] which suggests that aversive tension impairs the ability to name experienced emotions immediately and for a certain time span.



1  
2  
3  
4  
5  
6  
7 The previous mentioned findings are in line with the transactional model of BPD proposed by  
8 Fruzzetti *et al.*, [19] understanding BPD as an disorder of emotion regulation. Clear and brief,  
9 biological vulnerability together with invalidating responses from others regarding the  
10 emotional state of the subject will lead to aversive tension. To reduce these states of aversive  
11 tension, patients with BPD will then most likely use dysfunctional emotion regulation  
12 strategies like NSSI. Recently Haynos *et al.* [12] adapted this model for AN, emphasising the  
13 idea that AN is also a disorder of emotion regulation. They suggest that a person with AN will  
14 experience aversive tension especially after events related to food intake or body exposure.  
15 Instead of using NSSI as an emotion regulation strategy like patients with BPD, persons  
16 suffering from AN will tend to excessive exercising (after food intake) or starvation behaviour  
17 (after e.g. body exposure, criticism by intimates) for a brief reduction in arousal. This will  
18 thereby lead, via negative reinforcement, to a circulus vitiosus with more frequent starvation  
19 behaviour and body weight reduction. This is supported by a recent study relating lower body  
20 mass indices in women with acute AN to fewer emotion regulation problems, although this  
21 association was not observed in other sub-samples.[20]

22  
23  
24  
25  
26  
27  
28 Although clinical practice indicates that patients with AN benefit from DBT skills training,  
29 empirical research is still scarce. So far, there has been only one controlled trial conducted  
30 comparing DBT with treatment as usual (TAU) in adolescent patients with AN.[21] Few pilot  
31 studies on adapted DBT programmes for patients with AN and a co-morbid BPD exist,[22,  
32 23] but all of these findings are promising regarding the effectiveness of DBT in the therapy  
33 of AN. As previously mentioned, DBT focuses on emotion regulation. The previous studies  
34 regarding DBT treatment of AN suppose by adopting DBT for AN that emotion regulation  
35 problems and aversive tension are the main factors for starvation behaviour, but surprisingly  
36 the occurrence of aversive tension in AN was never questioned in an empirical study before.  
37 Neither is there any literature on the experience of aversive tension of adolescents, although  
38 DBT manuals for the treatment of adolescents with high risk for NSSI have been published  
39 recently.[24, 25] Regarding the inability to label emotions, it is also unclear if this is a specific  
40 BPD problem, a general psychopathology phenomenon or a consequence of aversive tension.  
41 Therefore, the main aim of this study is to show if adolescent patients with AN differ from  
42 control subjects in their report of experienced aversive tension. Additionally, we will  
43 investigate a possible relation to the ability to label emotions on an exploratory level.

44  
45  
46  
47  
48  
49  
50  
51  
52  
53  
54  
55  
56  
57  
58  
59  
60  
In the past the observance of mood or behaviour in everyday life was mostly conducted by  
filling in paper-based diaries or more recently by using hand-held computers distributed by  
the research group.[26] Due to the lack of high quality and reasonably priced software,

usually the programming for the hand-held computer devices was done by the researcher himself. Currently, the wide distribution of smartphone devices especially in the population of adolescents offers a new way for an ambulatory monitoring of mood changes in daily course. For the most common smartphone software, Android® and iOS®, there are low priced and user-friendly monitoring software solutions available.[27] The benefit of using the subjects' own devices may not only be the lower research costs. Especially in the research with adolescent subjects, a software application run on their smartphone instead of a less accessible and old fashioned research device could be preferred and lead to less missing data.

### Aims

The aim of this study is to investigate for the first time the experience of aversive tension of patients with an AN diagnosis. We hypothesize that in a period of two days the patient sub-sample will report (1) higher average values and (2) higher maximum values of aversive tension.

## METHODS AND ANALYSIS

The current study will be an observational case-control study with a sample size of at least 40 participants. Figure 1 provides a brief overview of the assessment schedule.

### Participants and recruitment

The study is taking place at the medical centres Rheinhausen-Fachklinik Mainz in cooperation with the Department of Child and Adolescent Psychiatry and Psychotherapy of the Universitaetsmedizin at the Johannes-Gutenberg Universitaet Mainz ~~and DRK Fachklinik Bad Neuenahr, Germany.~~ Both entities The entity will invite outpatients with AN to participate in the study. Control subjects are recruited in the local region by word-of-mouth invitation of the study coordinator.

### Inclusion and exclusion criteria

Due to the low prevalence of AN in the male population [28] and to avoid confounding variables by gender, only female outpatients between 12 and 19 years with a current diagnosis of AN (according to the International Classification of Diseases, version 10; ICD-10) will be included. The diagnosis must be ~~confirmed-made~~ by the outpatient clinics of the medical centres Rheinhausen-Fachklinik Mainz ~~or DRK Fachklinik Bad Neuenahr based on~~ with the German version of the Eating Disorder Examination adapted for children (chEDE) [29], a structured interview for the assessment of eating disorders. Co-morbidity will be assessed

1  
2  
3  
4  
5  
6  
7  
8  
9  
10  
11  
12  
13  
14  
15  
16  
17  
18  
19  
20  
21  
22  
23  
24  
25  
26  
27  
28  
29  
30  
31  
32  
33  
34  
35  
36  
37  
38  
39  
40  
41  
42  
43  
44  
45  
46  
47  
48  
49  
50  
51  
52  
53  
54  
55  
56  
57  
58  
59  
60

with the German Kiddie-Sads-Present and Lifetime Version (K-SADS-PL), a reliable and valid semi-structured interview for the assessment of mental disorders.[30] Participants of the patient group will be excluded in case of or presumed diagnosis of an impulsive personality disorder (F60.30) or emotionally unstable personality disorder also called BPD (F60.31). Previous studies have already shown the existence of states of high aversive tension in patients with this type of personality disorders.[9]. In case of a BMI under the third percentile, patients will be referred to inpatient treatment and will not be included in the study. Other comorbid disorders will be allowed if AN is the primary diagnosis. Control participants with any diagnosis of a mental disorder in the last five years will be excluded, as well as control participants with a high symptom burden based on the global severity index. For a summary of inclusion and exclusion criteria, see Table 1.

**Table 1. Summary of inclusion and exclusion criteria**

| Inclusion criteria          | Patient group                                                                                                                                                                                                                                        | Control group                                                                                                                                   |
|-----------------------------|------------------------------------------------------------------------------------------------------------------------------------------------------------------------------------------------------------------------------------------------------|-------------------------------------------------------------------------------------------------------------------------------------------------|
| Gender                      | Female                                                                                                                                                                                                                                               | female                                                                                                                                          |
| Age                         | 12 to 19 years                                                                                                                                                                                                                                       | 12 to 19 years                                                                                                                                  |
| Disorder                    | <u>Diagnosis of Anorexia nervosa (F50.0), based on the chEDE.</u>                                                                                                                                                                                    | Healthy controls                                                                                                                                |
| Experience with smartphones | Existent                                                                                                                                                                                                                                             | existent                                                                                                                                        |
| Exclusion criteria          |                                                                                                                                                                                                                                                      |                                                                                                                                                 |
| Disorder                    | <del>(presumed) diagnosis of impulsive personality disorder (F60.30)</del><br><del>emotionally unstable personality disorder (F60.31)(presumed)</del><br><u>diagnosis of a personality disorder</u><br><u>BMI &lt; 3<sup>rd</sup> BMI-percentile</u> | any diagnosis of a mental disorder in the past five years<br><br>high symptom burden ( $T \geq 63$ on the global severity index of the SCL90-R) |

Formatted: Font: (Default) Times New Roman, 12 pt

### Primary and secondary outcomes

The primary outcome of the study is the mean value of aversive tension; co-primary is the maximum value of aversive tension.

1  
2  
3  
4  
5  
6  
7  
8  
9  
10  
11  
12  
13  
14  
15  
16  
17  
18  
19  
20  
21  
22  
23  
24  
25  
26  
27  
28  
29  
30  
31  
32  
33  
34  
35  
36  
37  
38  
39  
40  
41  
42  
43  
44  
45  
46  
47  
48  
49  
50  
51  
52  
53  
54  
55  
56  
57  
58  
59  
60

Main secondary outcome is the daily course of aversive tension (e.g. increases, decreases), the ability to label emotions, and reported emotions and occupations. To assess the acceptance of the method, we will report differences in the compliance of both groups.

In addition we will explore the usability of the smartphone application and the acceptance of using a personal smartphone. Influencing factors are socio-demographic data, mental symptom burden, emotion regulation strategies (FEEL-KJ) and the actual experienced emotion as well as the actual occupation at each assessment moment.

### Assessments

Both control subjects and patients will participate in a pre-questionnaire (socio-demographics, SCL90-R, FEEL-KJ) before the actual ambulatory monitoring and a post-questionnaire (adapted version of the UEQ) afterwards, measuring the user experience of the applied software. In addition to a short socio-demographic questionnaire, participants will fill in an electronic version of the following questionnaires:

**SCL90-R:** The symptom checklist (German version) is a measure of general psychopathological symptom severity and has been widely used in studies and clinical practice.[310] Besides three global indices, the SCL90-R measures the intensity of specific symptom groups on nine subscales. The internal consistencies (Cronbach's alpha) for the scales are in the range of  $\alpha = 0.74$  and  $\alpha = 0.97$  and the test has shown a test-retest-reliability of  $r \geq 0.69$ . In a large German adolescent survey, the SCL90-R showed a high general validity for the use as an instrument for measuring general symptom burden.[324] The manual of the SCL90-R proposes a cut-off at  $T \geq 63$  at the global severity index for participants with a high symptom burden.

**FEEL-KJ:** The FEEL-KJ is a German instrument for the measurement of emotion regulation of children and adolescents.[332] It measures multi-dimensional and emotion-specific emotion regulation strategies for the emotions anxiety, anger and grief providing both adaptive (e.g. cognitive problem-solving, acceptance) and maladaptive strategies (e.g. perseverance, resignation). Internal consistencies (Cronbach's alpha) for the two secondary strategies are good ( $\alpha = 0.82$  for maladaptive,  $\alpha = 0.93$  for adaptive strategies). Six week test-retest-reliabilities for all strategies are between  $r = 0.62$  and  $r = 0.81$ . Regarding construct validity, adaptive emotion regulation strategies show generally low correlations with maladaptive strategies which indicate independent secondary strategies. Factorial analysis supports the two component structure. Correlations with other scales show sufficient construct validity of the questionnaire.

1  
2  
3  
4  
5  
6  
7  
8  
9  
10  
11  
12  
13  
14  
15  
16  
17  
18  
19  
20  
21  
22  
23  
24  
25  
26  
27  
28  
29  
30  
31  
32  
33  
34  
35  
36  
37  
38  
39  
40  
41  
42  
43  
44  
45  
46  
47  
48  
49  
50  
51  
52  
53  
54  
55  
56  
57  
58  
59  
60

**UEQ:** The user experience questionnaire is a questionnaire primarily developed for measuring the usability of websites [343] and one of the few reliable scales for measuring usability. This is conducted by rating the website or application on various dimensions on a 7-point scale (e.g. if an application is rather attractive than unattractive, more creative than dull).

The UEQ contains six subscales of different facets of user experience. Internal consistencies (Cronbach's alpha) for the German version of the subscales are between  $\alpha = 0.73$  and  $\alpha = 0.89$ . Participants will fill in the UEQ after the ambulatory monitoring when they meet again with the study coordinator at the medical centre to copy the data from their smartphones. Due to technical reasons, this questionnaire will be provided as a paper-version.

### **Ambulatory Monitoring**

Both groups will participate in an ambulatory monitoring for two days assessing data on their own smartphones after they have filled in a pre-questionnaire. The free data collecting software Epicollect [354] developed at the Imperial College London will be used on the participants' own devices. A screenshot of the application can be seen in Figure 2. After informing the participants about how to use the application, researchers will download the software and the questionnaire form on the smartphone and arrange the individual sleeping periods with the participants when they will not be asked for data entry. Additionally, the participants will receive a short briefing regarding aversive tension. The participants will be advised that aversive tension is a state of unpleasant and high arousal which is only randomly accompanied by a specific emotion in line with the DBT manuals.[7, 25] They will be told that on a scale from 0 to 100, the range of 70 to 100 stands for high tension normally only experienced in traumatic situations. Furthermore, participants will be told to imagine two exemplary events and their respective range of aversive tension that could possibly be provoked by such events. Data will be assessed during school days only, to prevent confounding the data by subjects who participate on weekends. Earlier studies [9] suggest that a two-day monitoring provides sufficient data for analysis without the risk of loss of interest. During the 48 hours of the monitoring, participants will receive hourly text messages to their mobile phones which prompt to fill in the questionnaire. The questionnaire consists of four items which can be seen in Table 2.

**Table 2. Items, answer categories and outcome variables of the ambulatory monitoring questionnaire**

| Item (original German version)                                                                                                                                                                                                                 | answer category                                                 | outcome variable          |
|------------------------------------------------------------------------------------------------------------------------------------------------------------------------------------------------------------------------------------------------|-----------------------------------------------------------------|---------------------------|
| On a scale from 0 – not present to 100 – extremely intense, at this time, how intense is your emotional tension?<br>(Auf einer Skala von 0 [nicht vorhanden] bis 100 [extreme stark], wie stark ist jetzt gerade deine emotionale Anspannung?) | 0 – 100, answered by filling in the number in a text field      | aversive tension          |
| On a scale from 0 – not at all to 9 – very good, how well can you name the emotion that you are feeling right now? (Auf einer Skala von 0 [gar nicht] bis 9 [sehr gut], wie gut kannst Du die Emotion benennen, die Du gerade spuerst?)        | 0 to 9, answered by single choice in a drop down selection menu | ability to label emotions |
| Which emotion(s) are you experiencing right now? (Welche Emotion[en] verspuerst du gerade?)                                                                                                                                                    | open text field                                                 | emotions                  |
| What have you done immediately before responding to the questions? (Was hast du kurz vor dem Beantworten der Fragen gemacht?)                                                                                                                  | open text field                                                 | occupation                |

**Sample-size calculation**

In this study, aversive emotional tension is scored between zero and 100. An earlier study [9] compared the experienced aversive tension of patients with BPD with mentally healthy control subjects finding that the adult control subjects reported mean values of tension near zero on a scale from zero to nine. In another study, Ebner-Priemer *et al.* [10] used a scale from zero to ten to measure aversive tension. Different from them, we will use a broader scale (zero to 100) as used in DBT manuals.[7, 25] Furthermore, we will examine adolescent subjects who might experience more aversive tension than adults. Therefore, we expect slightly increased mean levels and variances of aversive tension compared to the former mentioned study both in patient and control group. We expect an effect size of  $d \geq 0.8$  to be a

1  
2  
3  
4  
5  
6  
7  
8  
9  
10  
11  
12  
13  
14  
15  
16  
17  
18  
19  
20  
21  
22  
23  
24  
25  
26  
27  
28  
29  
30  
31  
32  
33  
34  
35  
36  
37  
38  
39  
40  
41  
42  
43  
44  
45  
46  
47  
48  
49  
50  
51  
52  
53  
54  
55  
56  
57  
58  
59  
60

clinically relevant.[356] As to the best knowledge of the investigators, there is no literature on the experience of aversive tension neither of individuals with a history of AN nor of adolescents. Hence, based on previous findings regarding adults and BPD[9], we suppose mean levels of 60 (patient group;  $SD_{patients} = 20$ ) and 40 (control group,  $SD_{controls} = 15$ ) regarding aversive tension. To achieve a statistical power of 80% of a two-sided t-test, a group sample size of at least 16 subjects (with  $\alpha = 0.05/2$  for testing two separate hypotheses, two-sided test) will be necessary. Furthermore, we will calculate with an overhead of 25% and therefore include at least 20 subjects in each group.

### Statistical analyses

Data will be assessed using SPSS software (version 21; SPSS Inc., Chicago, IL, USA). Correctness of the paper-submitted data will be assured by double-entry of the data. All three hypotheses will be tested separately. To ensure a global alpha error of  $\alpha = 0.05$ , we will adjust with the Holm procedure by organizing hypotheses regarding their obtained  $p$ -values.[376]

To test for group differences in aversive tension (1), we will first conduct mean values of aversive tension for every participant. Group means of patient and control group will then be tested using Welch's  $t$ -test for unequal variances. For hypothesis (2), we will test for differences in the reported individual maximum values using the non-parametric Mann-Whitney  $U$ -test.

On an exploratory level we will analyse the time course of aversive tension, its relation to the ability to label emotions and possible group differences regarding the valence of named emotions. We will then analyse differences regarding the compliance (missing values). Furthermore, we will group the named emotions in positive and negative to compute an index of valence. Regarding the usability of the method, we will analyse the reported usability of the software.

### ETHICS AND DISSEMINATION

The ethics committee of the regional medical association in Mainz, Germany approved the study protocol under the reference number 837.177.13 and the study will be conducted according to the Helsinki Declaration. Data protection protocol was approved by the commissioner for data protection of the Rheinhessen-Fachklinik Mainz, Germany. Participation will require informed consent by participants and legal guardians in case of

1  
2  
3  
4  
5  
6  
7 minority. Participants and legal guardians can withdraw from the study at any time without  
8 further explanation and any negative consequences.

9  
10 Results will be disseminated through peer-reviewed publications and presentations at  
11 conferences.

## 12 **DISCUSSION**

13  
14 In this protocol we have presented the first controlled trial for studying aversive tension in  
15 patients with AN in an ambulatory monitoring setting. Thereby, the experience of aversive  
16 tension in patients with AN and adolescent control participants will be observed hourly in a  
17 48 hour monitoring using the participants' own devices. We hope that our study will provide  
18 data for a better understanding of how aversive tension and emotion regulation are part of this  
19 specific eating disorder. In contrast to paper based documentation, the presented concept is an  
20 advantage due to reduced reminding efforts and recall bias. The achieved result of this trial  
21 will furthermore have direct relevance for DBT and will be a basis for further research  
22 regarding efficiency and therapy outcomes of DBT for AN.

23  
24 Due to the ambulatory monitoring design, there are some limitations of the study such as  
25 observance of outpatients only, as inpatients might experience stronger states of aversive  
26 tension. Conversely, comparing outpatients and control participants allows us to collect data  
27 in a daily life setting including school times.

28  
29 A possible trigger for aversive tension in patients with AN might be meal situations. We  
30 decided to not assess the last food intake, as this might cause aversive tension itself and  
31 therefore confound the data. Additionally, there is no literature on which situations or  
32 emotions could trigger aversive tension in patients with AN. Therefore, we decided to conduct  
33 a naturalistic trial.

34  
35 An additional challenge is the technical aspect of the ambulatory monitoring. As the software  
36 was not designed for ambulatory monitoring purposes in particular, the handling is somewhat  
37 more complex in than a simple paper-based diary or an expensive commercial software  
38 solution. However, we expect that the possible benefits, such as more privacy during filling in  
39 the items, of the software will outweigh any possible drawbacks. If the usability outcomes are  
40 positive, this might encourage other researchers to use this free available application or to  
41 further develop it, therefore making it more suitable for ambulatory monitoring purposes, e.g.  
42 by implementing a notification function. The principle of using the smartphone as a tool in  
43 therapy for promptly self-reflection has to be developed in further investigations. A transfer of  
44 the concept to further conditions and disorders is welcomed.



1  
2  
3  
4  
5  
6  
7  
8  
9  
10  
11  
12  
13  
14  
15  
16  
17  
18  
19  
20  
21  
22  
23  
24  
25  
26  
27  
28  
29  
30  
31  
32  
33  
34  
35  
36  
37  
38  
39  
40  
41  
42  
43  
44  
45  
46  
47  
48  
49  
50  
51  
52  
53  
54  
55  
56  
57  
58  
59  
60

Regarding the statistical analysis, group comparisons of aggregated measures only permit analysis on one data level.[38] As in this study, we are primarily interested in a general group difference and not on interactions with other variables, standard group comparisons are the most economic statistical analysis regarding sample size and data structure requirements. However, if group differences appear to be significant, subsequent analyses using more advanced techniques, e.g. graphical vector analysis [39] or mixed model approaches [38] are recommended.

After this trial has been successfully conducted and if a difference in the experience of aversive tension of patients with AN compared to control participants has been observed, the relevance of aversive tension in other eating disorders could be examined and effects of DBT for patients with AN or adolescents patients in general on aversive tension could be investigated more thoroughly.

## COMPETING INTERESTS

The authors declare that they have no competing interests.

## CONTRIBUTORS

DK carries out the acquisition of data, participated in the design of the study and coordination and drafted the manuscript. AB and FH conceived the study, participated in its design and revised the manuscript. EJ participated in the design of the study and coordination and helped to draft the manuscript. All authors read and approved the final manuscript.

## ACKNOWLEDGEMENTS

All authors are employees of the Department of Child and Adolescent Psychiatry and Psychotherapy Mainz (Prof. Dr. Michael Huss), a collaboration unit between Universitaetsmedizin at the Johannes-Gutenberg-Universitaet and Rheinhessen Fachklinik at the Landeskrankenhaus Rheinland-Pfalz. ~~PD. Dr. Kristian Holtkamp is head of the DRK-Fachklinik Bad Neuenahr.~~ We are thankful to Prof. Dr. Eva Möhler and Andrea Dixius of the Department of Child and Adolescent Psychiatry and Psychotherapy at the SHG Klinik Idar-Oberstein for their participation in the development of this study. Patricia Meinhardt conducted proof reading. We are further thankful to all participants.

## FUNDING

This research received no specific grant from any funding agency in the public, commercial or not-for-profit sectors.

## REFERENCES

- 1 Zipfel S, Löwe B, Reas DL, et al. Long-term prognosis in anorexia nervosa: lessons from a 21-year follow-up study. *The Lancet* 2000;**355**:721–722.
- 2 Berkman ND, Lohr KN, Bulik CM. Outcomes of eating disorders: A systematic review of the literature. *Int J Eat Disord* 2007;**40**:293–309.
- 3 Zipfel S, Wild B, Groß G, et al. Focal psychodynamic therapy, cognitive behaviour therapy, and optimised treatment as usual in outpatients with anorexia nervosa (ANTOP study): randomised controlled trial. *The Lancet*. Published Online First: 14 October 2013. doi:10.1016/S0140-6736(13)61746-8
- 4 Schmidt U, Renwick B, Lose A, et al. The MOSAIC study - comparison of the Maudsley Model of Treatment for Adults with Anorexia Nervosa (MANTRA) with Specialist Supportive Clinical Management (SSCM) in outpatients with anorexia nervosa or eating disorder not otherwise specified, anorexia nervosa type: study protocol for a randomized controlled trial. *Trials* 2013;**14**:160.
- 5 Sipos V, Bohus M, Schweiger U. Dialektisch-behaviorale Therapie für Essstörungen (DBT-E). *Psychother Psychosom Med Psychol* 2011;**61**(02):87–91.
- 6 Linehan MM. *Cognitive-behavioral treatment of borderline personality disorder*. New York: Guilford Press 1993a.
- 7 Linehan MM. *Skill training manual for treating borderline personality disorder*. New York: Guilford Press 1993b.
- 8 Stiglmayr CE, Shapiro DA, Stieglitz RD, et al. Experience of aversive tension and dissociation in female patients with borderline personality disorder — a controlled study. *J Psychiatr Res* 2001;**35**:111–118.
- 9 Stiglmayr CE, Grathwol T, Linehan MM, et al. Aversive tension in patients with borderline personality disorder: a computer-based controlled field study. *Acta Psychiatr Scand* 2005;**111**:372–379.
- 10 Ebner-Priemer UW, Kuo J, Schlotz W, et al. Distress and Affective Dysregulation in Patients With Borderline Personality Disorder. *J Nerv Ment Dis* 2008;**196**:314–320.
- 11 Zanarini MC, Frankenburg FR, DeLuca CJ, et al. The Pain of Being Borderline: Dysphoric States Specific to Borderline Personality Disorder. *Harv Rev Psychiatry* 1998;**6**:201–207.
- 12 Haynos AF, Fruzzetti AE. Anorexia Nervosa as a Disorder of Emotion Dysregulation: Evidence and Treatment Implications. *Clin Psychol* 2011;**18**:183–202.
- 13 Coid J. An affective syndrome in psychopaths with Borderline Personality-Disorder. *Br J Psychiatry* 1993;**162**:641–650.
- 14 Wolff S, Stiglmayr C, Bretz HJ, et al. Emotion identification and tension in female patients with borderline personality disorder. *Br J Clin Psychol* 2007;**46**:347–360.
- 15 Russell JA. A Circumplex Model of Affect. *J Pers Soc Psychol* 1980;**39**:1161–1178.
- 16 Brown MZ, Comtois KA, Linehan MM. Reasons for suicide attempts and nonsuicidal self-injury in women with borderline personality disorder. *J Abnorm Psychol* 2002;**111**:198–202.
- 17 Reitz S, Krause-Utz A, Pogatzki-Zahn EM, et al. Stress Regulation and Incision in Borderline Personality Disorder—A Pilot Study Modeling Cutting Behavior. *J Pers Disord* 2012;**26**(4):605–615.
- 18 Chapman AL, Gratz KL, Brown MZ. Solving the puzzle of deliberate self-harm: The experiential avoidance model. *Behav Res Ther* 2006;**44**:371–394.
- 19 Fruzzetti AE, Shenk C, Hoffman PD. Family interaction and the development of borderline personality disorder: A transactional model. *Dev Psychopathol* 2005;**17**:1007–1030.

1  
2  
3  
4  
5  
6  
7  
8  
9  
10  
11  
12  
13  
14  
15  
16  
17  
18  
19  
20  
21  
22  
23  
24  
25  
26  
27  
28  
29  
30  
31  
32  
33  
34  
35  
36  
37  
38  
39  
40  
41  
42  
43  
44  
45  
46  
47  
48  
49  
50  
51  
52  
53  
54  
55  
56  
57  
58  
59  
60

- 20 Brockmeyer T, Grosse Holtforth M, Bents H, et al. Starvation and emotion regulation in anorexia nervosa. *Compr Psychiatr* 2012;**53**:496–501.
- 21 Salbach-Andrae H, Bohnkamp I, Bierbaum T, et al. Dialektisch Behaviorale Therapie (DBT) und Kognitiv Behaviorale Therapie (CBT) für Jugendliche mit Anorexia und Bulimia nervosa im Vergleich. *Kindheit und Entwicklung* 2009;**18**:180–190.
- 22 Kröger C, Schweiger U, Sipos V, et al. Dialectical behaviour therapy and an added cognitive behavioural treatment module for eating disorders in women with borderline personality disorder and anorexia nervosa or bulimia nervosa who failed to respond to previous treatments. An open trial with a 15-month follow-up. *J Behav Ther Exp Psychiatry* 2010;**41**:381–388.
- 23 Federici A, Wisniewski L. An intensive DBT program for patients with multidagnostic eating disorder presentations: A case series analysis. *Int J Eat Disord* 2013;**46**:322–331.
- 24 Miller AL, Rathus JH, Linehan M. *Dialectical behavior therapy with suicidal adolescents*. New York: Guilford Press 2007.
- 25 Fleischhaker C, Sixt B, Schulz E. *DBT-A: Dialektisch-behaviorale Therapie für Jugendliche*. Berlin: Springer 2011.
- 26 Fahrenberg J, Myrtek M, Pawlik K, et al. Ambulatory Assessment - Monitoring Behavior in Daily Life Settings. *Eur J Psychol Assess* 2007;**23**:206–213.
- 27 Kubiak T, Krog K. Computerized Sampling of Experience and Behavior. In: Mehl MR, Conner TS, eds. *Handbook of research methods for studying daily life*. New York: Guilford 2011.
- 28 Kjelsås E, Bjørnstrøm C, Götestam KG. Prevalence of eating disorders in female and male adolescents (14–15 years). *Eat Behav* 2004;**5**:13–25.
- 29 Hilbert A, Bueger A, Hartmann AS, et al. Psychometric Evaluation of the Eating Disorder Examination Adapted for Children. *Eur Eat Disord Rev* 2013;**21**:330–339.
- 30 Delmo C, Weiffenbach O, Gabriel M, et al. *Kiddie-SADS - Present and Lifetime Version (K-SADS-PL): Deutsche Forschungsversion*. Frankfurt: University of Frankfurt/M 2001.
- 31 Franke GH. SCL-90-R. *Die Symptom-Checkliste von Derogatis - Deutsche Version*. Göttingen: Beltz Test 1995.
- 32 Essau CA, Groen G, Conradt J, et al. Validität und Reliabilität der SCL-90-R: Ergebnisse der Bremer Jugendstudie. *Zeitschrift für Differentielle und Diagnostische Psychologie* 2001;**22**:139–152.
- 33 Grob A, Smolenski C. *Fragebogen zur Erhebung der Emotionsregulation bei Kindern und Jugendlichen (FEEL-KJ)*. Bern: Verlag Hans Huber 2005.
- 34 Laugwitz B, Held T, Schrepp M. Construction and Evaluation of a User Experience Questionnaire. In: Holzinger A, ed. *HCI and Usability for Education and Work*. Berlin: Springer 2008:63–76.
- 35 Aanensen DM, Huntley DM, Feil EJ, et al. EpiCollect: Linking Smartphones to Web Applications for Epidemiology, Ecology and Community Data Collection. *PLoS ONE* 2009;**4**(9).
- 36 Cohen J. *Statistical power analysis for the behavioral sciences*. 2nd edn. Hillsdale: L. Erlbaum Associates 1988.
- 37 Holm S. A Simple Sequentially Rejective Multiple Test Procedure. *Scandinavian Journal of Statistics. Scand Stat Theory Appl* 1979;**6**:65–70.
- 38 Nezlek JB, Schröder-Abé M, Schütz A. Mehrebenenanalysen in der psychologischen Forschung. *Psychologische Rundschau* 2006;**4**:213–223.
- 39 Wild B, Eichler M, Friedrich HC, et al. A graphical vector autoregressive modeling approach to the analysis of electronic diary data. *BMC Med Res Methodol* 2010;**10**:28

Formatted: German (Germany)

Formatted: German (Germany)

Formatted: Font: Italic

Formatted: German (Germany)

Formatted: German (Germany)

Comment [D1]: Nummerierung!! Auch im Fließtext überprüfen.

Formatted: German (Germany)

Formatted: Font: Italic

Formatted: Font: Bold

Formatted: German (Germany)

Formatted: Font: Italic

Formatted: Font: Bold

1  
2  
3  
4  
5  
6  
7 **FIGURES**

8 Figure 1. – Study schedule

9  
10 Figure 2. – Ambulatory monitoring questionnaire as seen in the smartphone application  
11  
12  
13  
14  
15  
16  
17  
18  
19  
20  
21  
22  
23  
24  
25  
26  
27  
28  
29  
30  
31  
32  
33  
34  
35  
36  
37  
38  
39  
40  
41  
42  
43  
44  
45  
46  
47  
48  
49  
50  
51  
52  
53  
54  
55  
56  
57  
58  
59  
60

For peer review only

1  
2  
3  
4  
5  
6  
7  
8  
9  
10  
11  
12  
13  
14  
15  
16  
17  
18  
19  
20  
21  
22  
23  
24  
25  
26  
27  
28  
29  
30  
31  
32  
33  
34  
35  
36  
37  
38  
39  
40  
41  
42  
43  
44  
45  
46  
47  
48  
49  
50  
51  
52  
53  
54  
55  
56  
57  
58  
59  
60

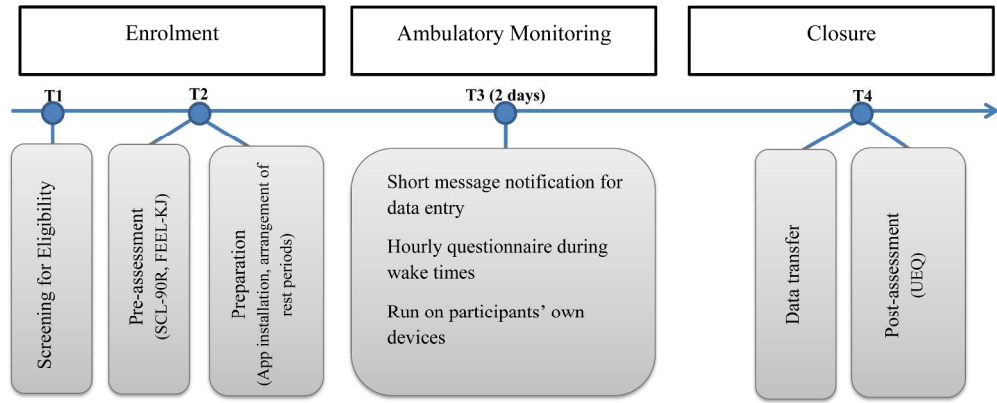

Figure 1. Study schedule  
253x114mm (300 x 300 DPI)

Peer review only

1  
2  
3  
4  
5  
6  
7  
8  
9  
10  
11  
12  
13  
14  
15  
16  
17  
18  
19  
20  
21  
22  
23  
24  
25  
26  
27  
28  
29  
30  
31  
32  
33  
34  
35  
36  
37  
38  
39  
40  
41  
42  
43  
44  
45  
46  
47  
48  
49  
50  
51  
52  
53  
54  
55  
56  
57  
58  
59  
60

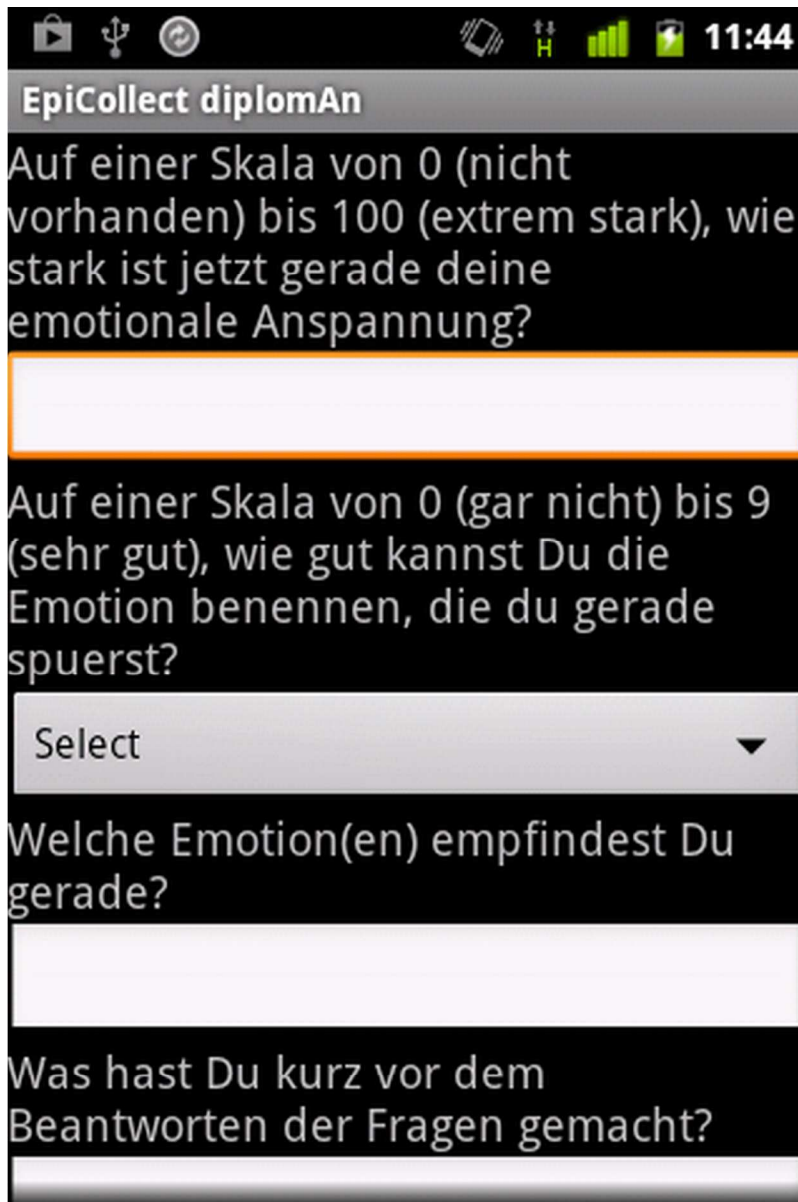

The screenshot shows the EpiCollect diplomAn application interface. At the top, there is a status bar with icons for camera, USB, rotation, mobile data, signal strength, battery, and the time 11:44. Below the status bar is a header bar with the text "EpiCollect diplomAn". The main content area contains three questions, each followed by a text input field:

Auf einer Skala von 0 (nicht vorhanden) bis 100 (extrem stark), wie stark ist jetzt gerade deine emotionale Anspannung?

Auf einer Skala von 0 (gar nicht) bis 9 (sehr gut), wie gut kannst Du die Emotion benennen, die du gerade spuerst?

Select

Welche Emotion(en) empfindest Du gerade?

Was hast Du kurz vor dem Beantworten der Fragen gemacht?

Figure 2. Ambulatory monitoring questionnaire as seen in the smartphone application
